# Supplementary material for: Extreme red shifted SERS nanotags
Source: PubMed Central journal article supplement (PMC5645778; doi:10.1039/c4sc03917c), 2015-01-21
Supplement: SC-006-C4SC03917C-s001.pdf [file SC-006-C4SC03917C-s001.pdf]

## Supporting Information

### Extreme Red Shifted SERS Nanotags

Matthew A. Bedics,<sup>†</sup> Hayleigh Kearns,<sup>‡</sup> Jordan Cox,<sup>†</sup> Sam Mabbott,<sup>‡</sup> Fatima Ali,<sup>‡</sup> Neil C. Shand,<sup>§</sup> Karen Faulds,<sup>‡</sup> Jason B. Benedict,<sup>†</sup> Duncan Graham,<sup>‡,\*</sup> and Michael R. Detty<sup>†,\*</sup>

<sup>†</sup> Department of Chemistry, University at Buffalo, The State University of New York, New York 14260, United States

<sup>‡</sup> Centre for Molecular Nanometrology, WestCHEM, Department of Pure and Applied Chemistry, University of Strathclyde, 295 Cathedral Street, Glasgow, G1 1XL, United Kingdom

<sup>§</sup> Dstl, Porton Down, Salisbury, UK

### Table of Contents

|                                                                                                                                                                 |         |
|-----------------------------------------------------------------------------------------------------------------------------------------------------------------|---------|
| General Experimental                                                                                                                                            | S3      |
| Scheme S1. Synthesis of thiopyranone <b>16a</b> and 4-methylpyrylium salt <b>15c</b>                                                                            | S3      |
| Detailed Experimental                                                                                                                                           | S3-S14  |
| Scheme S2. Synthesis of chalcogenopyrylium dyes <b>1-14</b>                                                                                                     | S5      |
| Synthesis of HGNs                                                                                                                                               | S14     |
| Characterisation of HGNs                                                                                                                                        | S14     |
| Chemometrics                                                                                                                                                    | S15     |
| Figure S1. SERS spectra and structures of dyes <b>1-14</b>                                                                                                      | S16-S20 |
| Figure S2. a) Extinction spectrum showing the SPR of the HGNs at 720 nm<br>b) Extended extinction spectra showing that the SPR does not shift upon aggregation. | S20     |
| Figure S3. SERS spectra for dye <b>13</b> with gold and silver nanoparticles                                                                                    | S21     |
| Figure S4. Unaggregated SERS spectra of dyes <b>13</b> and <b>14</b> analyzed with HGNs                                                                         | S21     |
| Figure S5. SERS spectra and structures of BPE and AZPY with HGNs                                                                                                | S22     |
| Figure S6. PC loading plots                                                                                                                                     | S22     |
| Figure S7. SERS particle dilution studies for dyes <b>1-13</b>                                                                                                  | S23-S24 |
| References                                                                                                                                                      | S25     |
| Crystallographic details of dye <b>14</b>                                                                                                                       | S26     |
| Figure S8. Calculated angles between mean planes in dye <b>14</b>                                                                                               | S26     |
| Table S1. Crystal data and structure refinement for dye <b>14</b>                                                                                               | S27     |

|                                                                                                                                                         |     |
|---------------------------------------------------------------------------------------------------------------------------------------------------------|-----|
| Table S2. Fractional Atomic Coordinates ( $\times 10^4$ ) and Equivalent Isotropic Displacement Parameters ( $\text{\AA}^2 \times 10^3$ ) for <b>14</b> | S28 |
| Table S3. Anisotropic Displacement Parameters ( $\text{\AA}^2 \times 10^3$ ) for <b>14</b>                                                              | S30 |
| Table S4. Bond Lengths for <b>14</b>                                                                                                                    | S32 |
| Table S5. Bond Angles for <b>14</b>                                                                                                                     | S33 |
| Table S6. Torsion angles for <b>14</b>                                                                                                                  | S35 |
| Table S7. Atomic occupancy for dye <b>14</b>                                                                                                            | S37 |
| Crystallographic references                                                                                                                             | S37 |

## General Experimental

All reactions were performed open to air unless otherwise noted. Concentration *in vacuo* was performed on a rotary evaporator. NMR spectra were recorded at 300 or 500 MHz for  $^1\text{H}$  and at 75.5 MHz for  $^{13}\text{C}$  with residual solvent signal as internal standard. UV/VIS-near-IR spectra were recorded in quartz cuvettes with a 1-cm path length. Melting points were determined with a capillary melting point apparatus and are uncorrected. Non-hygroscopic compounds have a purity of  $\geq 95\%$  as determined by elemental analyses for C, H, and N. Experimental values of C, H, and N are within 0.3% of theoretical values.  $^{13}\text{C}$  NMR spectra were not recorded for pyrylium dyes due to limited solubility in common NMR solvents. Pyranones **16b-16d** are known compounds.<sup>S1</sup> The synthesis of thiopyranone **16a** and 4-methylpyrylium salt **15c** is shown in Scheme S1. 4-Methylpyrylium salts **15a**, **15d**, and **15e** have been reported previously in the literature.<sup>S2-S4</sup>

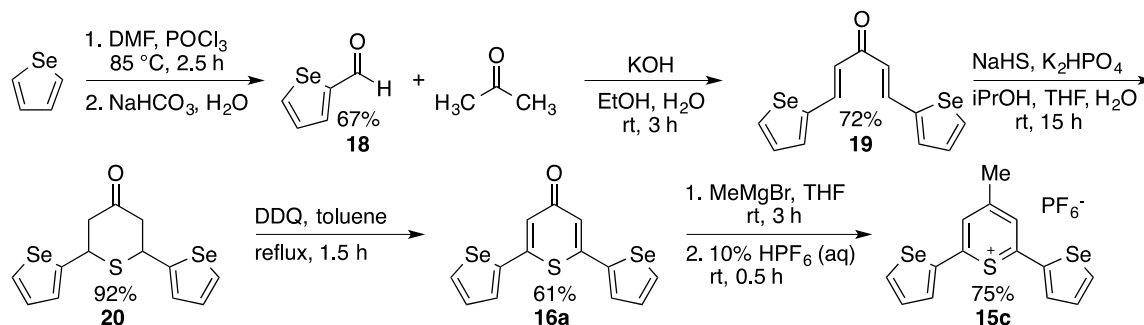

**Scheme S1.** Synthesis of thiopyranone **16a** and 4-methylpyrylium salt **15c**.

## Detailed Experimental

### Synthesis of selenophen-2-carboxaldehyde (**18**)<sup>S5</sup>

Anhydrous DMF (15.0 mL) was added to a flame dried flask under argon and cooled to 0 °C. POCl<sub>3</sub> (1.71 mL, 18.3 mmol) was added and the mixture allowed to stir for 0.5 h. The ice bath was removed, and selenophene (1.41 mL, 15.3 mmol) added. The reaction was heated to 85 °C and maintained at this temperature for 2.5 h. After cooling to ambient temperature, the mixture was poured into ice water (200 mL), neutralized with satd. NaHCO<sub>3</sub> (100 mL) and the product extracted with EtOAc (2 × 75 mL). The organic layer was dried with MgSO<sub>4</sub> and after concentration purified on SiO<sub>2</sub> with a 25% EtOAc/hexanes eluent to yield 1.64 g (67%) of a

colorless oil:  $^1\text{H}$  NMR [500 MHz,  $\text{CDCl}_3$ ]  $\delta$  9.83 (s, 1 H), 8.50 (d, 1 H,  $J = 5.5$  Hz), 8.03 (d, 1 H,  $J = 4.0$  Hz), 7.49-7.47 (m, 1 H).

#### **Synthesis of (1*E*,4*E*)-1,5-di(selenophen-2-yl)penta-1,4-dien-3-one (19)**

Selenophen-2-carbaldehyde (1.64 g, 10.3 mmol) and acetone (0.376 mL, 5.13 mmol) were dissolved in EtOH (10 mL). KOH (0.287 g, 5.13 mmol) dissolved in  $\text{H}_2\text{O}$  was added slowly to the stirring mixture and then allowed to stir for 3 h at ambient temperature. The solution was diluted with  $\text{H}_2\text{O}$  (50 mL), and the product extracted with  $\text{CH}_2\text{Cl}_2$  ( $2 \times 50$  mL). The organic layer was dried with  $\text{MgSO}_4$ , concentrated, and recrystallized from  $\text{CH}_2\text{Cl}_2$ /hexanes to yield 1.26 g (72%) of a yellow crystalline solid, mp 135-137  $^\circ\text{C}$ :  $^1\text{H}$  NMR [500 MHz,  $\text{CDCl}_3$ ]  $\delta$  8.09 (d, 2 H,  $J = 5.5$  Hz), 7.85 (d, 2 H,  $J = 15.5$  Hz), 7.52 (d, 2 H,  $J = 3.5$  Hz), 7.30 (m, 2 H), 6.70 (d, 2 H,  $J = 15.0$  Hz);  $^{13}\text{C}$  NMR [75.5 MHz,  $\text{CDCl}_3$ ]  $\delta$  187.5, 146.2, 137.8, 135.1, 133.9, 130.7, 125.7; HRMS (ESI, HRDFMagSec)  $m/z$  342.9131 (calcd for  $\text{C}_{13}\text{H}_{10}\text{O}^{80}\text{Se}_2+\text{H}^+$  : 342.9135).

#### **Synthesis of 2,6-di(selenophen-2-yl)tetrahydro-4*H*-thiopyran-4-one (20)**

(1*E*,4*E*)-1,5-Di(selenophen-2-yl)penta-1,4-dien-3-one (1.20 g, 3.51 mmol) was dissolved in THF (5.0 mL). To this mixture isopropyl alcohol (10 mL), and  $\text{K}_2\text{HPO}_4$  (0.961 g, 4.21 mmol) dissolved in  $\text{H}_2\text{O}$  were added followed by the addition of NaHS (0.356 g, 3.86 mmol). This was allowed to stir overnight at ambient temperature and under an argon atmosphere. The reaction was then diluted with  $\text{H}_2\text{O}$  (50 mL) and the product extracted with  $\text{CH}_2\text{Cl}_2$  ( $2 \times 50$  mL). The organic layer was dried with  $\text{MgSO}_4$ , concentrated and then recrystallized from  $\text{CH}_2\text{Cl}_2$ /hexanes to yield 1.21 g (92%) of an off-white solid, mp 115-116  $^\circ\text{C}$ :  $^1\text{H}$  NMR [300 MHz,  $\text{CDCl}_3$ ]  $\delta$  7.97 (dd, 2 H,  $J = 5.3, 2.0$  Hz), 7.21-7.17 (m, 4 H), 4.71 (dd, 2 H,  $J = 12.3, 5.0$  Hz), 3.14 (dd, 2 H,  $J = 13.8, 2.7$  Hz), 2.95 (m, 2 H);  $^{13}\text{C}$  NMR [75.5 MHz,  $\text{CDCl}_3$ ]  $\delta$  205.6, 149.3, 130.9, 129.1, 127.1, 52.0, 45.5; HRMS (EI, HRDFMagSec)  $m/z$  375.8933 (calcd for  $\text{C}_{13}\text{H}_{12}\text{OS}^{80}\text{Se}_2$  : 375.8934).

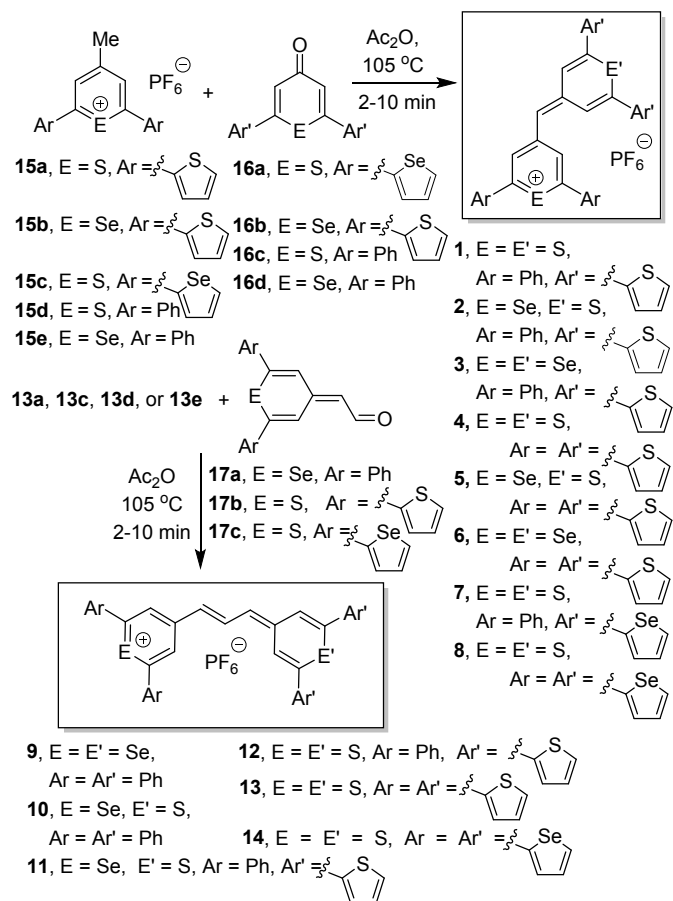

**Scheme S2.** Synthesis of chalcogenopyrylium dyes **1-14**.

### Synthesis of 2,6-di(selenophen-2-yl)-4*H*-thiopyran-4-one (**16a**)

2,6-Di(selenophen-2-yl)tetrahydro-4*H*-thiopyran-4-one (0.450 g, 1.20 mmol) was dissolved in anhydrous toluene (6.0 mL) and placed in a flame-dried flask under argon. 2,3-Dichloro-5,6-dicyano-1,4-benzoquinone (0.679 g, 2.99 mmol) was added in one portion and the reaction refluxed for 1.5 h. This was cooled to ambient temperature, diluted with CH<sub>2</sub>Cl<sub>2</sub> (50 mL) and the mixture washed with satd. aqueous NaHCO<sub>3</sub> (50 mL). The organic layer was separated, dried with MgSO<sub>4</sub>, and after concentration purified on SiO<sub>2</sub> with a 20% EtOAc/CH<sub>2</sub>Cl<sub>2</sub> eluent (*R<sub>f</sub>* 0.47) to yield 0.273 g (61%) of a light brown solid, mp 138-140 °C: <sup>1</sup>H NMR [500 MHz, CDCl<sub>3</sub>] δ 8.19 (dd, 2 H, *J* = 5.5, 1.5 Hz), 7.69 (dd, 2 H, *J* = 4.0, 1.5 Hz), 7.38 (m, 2 H), 7.09 (s, 2 H); <sup>13</sup>C NMR [75.5 MHz, CDCl<sub>3</sub>] δ 182.1, 146.8, 143.6, 134.8, 130.8, 129.5, 125.7; HRMS (ESI, HRDFMagSec) *m/z* 372.8699 (calcd for C<sub>13</sub>H<sub>8</sub>OS<sup>80</sup>Se<sub>2</sub>+H<sup>+</sup>: 372.8698).

### Synthesis of 4-methyl-2,6-di(2-thienyl)thiopyrylium hexafluorophosphate (**15a**)

2,6-Bis(thiophen-2-yl)-4H-thiopyran-4-one (0.288 g, 1.04 mmol) was dissolved in anhydrous THF (7.0 mL) in a flame dried flask under argon. 3.0 M MeMgBr (1.04 mL, 3.12 mmol) was added dropwise to this solution and allowed to stir at ambient temperature for 2 h. The solution was poured into 10% aqueous HPF<sub>6</sub> (50 mL) and allowed to stir for 15 min before the solid was isolated by filtration. The resulting solid was dissolved in CH<sub>2</sub>Cl<sub>2</sub>, dried with Na<sub>2</sub>SO<sub>4</sub>, and the solvent removed under reduced pressure. The product was then recrystallized from CH<sub>3</sub>CN/ether to yield 0.381 g (87%) of a bright red solid, mp 190-192 °C: <sup>1</sup>H NMR [500 MHz, CD<sub>3</sub>CN] δ 8.35 (s, 2 H), 8.08-8.07 (m, 4 H), 7.39 (t, 2 H, *J* = 5.0 Hz), 2.78 (s, 3 H); <sup>13</sup>C NMR [75.5 MHz, CD<sub>3</sub>CN] δ 167.6, 160.0, 137.9, 137.2, 134.0, 131.8, 131.2, 25.9; HRMS (ESI, HRDFMagSec) *m/z* 275.0021 (calcd for C<sub>14</sub>H<sub>11</sub>S<sub>3</sub><sup>+</sup>: 275.0017).

#### **Synthesis of 4-methyl-2,6-bis(2-thienyl)selenopyrylium hexafluorophosphate (15b)**

In a flame-dried flask under argon, 2,6-bis(thiophen-2-yl)-4H-selenopyran-4-one (0.200 g, 0.621 mmol), was dissolved in anhydrous THF (5.0 mL). 3.0 M MeMgBr (0.620 mL, 1.86 mmol) was added dropwise and the solution allowed to stir at ambient temperature for 0.5 h. The mixture was quenched with MeOH (1 mL), poured into 10% aqueous HPF<sub>6</sub> (50 mL), and extracted with CH<sub>2</sub>Cl<sub>2</sub> (3 × 25 mL). The organic layer was dried with Na<sub>2</sub>SO<sub>4</sub>, concentrated under reduced pressure, and then recrystallized from CH<sub>3</sub>CN/ether to yield 0.239 g (82%) of a red solid, mp 185-187 °C: <sup>1</sup>H NMR [500 MHz, CD<sub>3</sub>CN] δ 8.23 (s, 4 H), 8.11 (d, 2 H, *J* = 5.5 Hz), 8.02 (d, 2 H, *J* = 4.5 Hz), 7.39 (t, 2 H, *J* = 4.0 Hz), 2.70 (s, 3 H); <sup>13</sup>C NMR [75.5 MHz, CD<sub>3</sub>CN] δ 168.2, 167.7, 139.7, 134.0, 132.10, 131.4, 27.3; HRMS (ESI, HRDFMagSec) *m/z* 322.9469 (calcd for C<sub>14</sub>H<sub>11</sub>S<sub>2</sub><sup>80</sup>Se<sup>+</sup>: 322.9462).

#### **Synthesis of 4-methyl-2,6-di(selenophen-2-yl)thiopyrylium hexafluorophosphate (15c)**

2,6-di(selenophen-2-yl)-4H-thiopyran-4-one (0.300 g, 0.807 mmol) was dissolved in anhydrous THF (8.0 mL) in a flame-dried flask under argon. 3.0 M MeMgBr (0.807 mL, 2.42 mmol) was added dropwise and the reaction stirred at ambient temperature for 1 h. The reaction was poured into 10% aqueous HPF<sub>6</sub> (40 mL), and stirred for 10 min. The resulting solid was extracted with a mixture of CH<sub>2</sub>Cl<sub>2</sub> (50 mL) and CH<sub>3</sub>CN (5.0 mL), dried with Na<sub>2</sub>SO<sub>4</sub>, and after concentration recrystallized from CH<sub>3</sub>CN/ether to yield 0.312 g (75%) of a bright red solid, mp >260 °C: <sup>1</sup>H NMR [500 MHz, CD<sub>3</sub>CN] δ 8.78 (d, 2 H, *J* = 5.5 Hz), 8.26-8.25 (m, 4 H), 7.61 (t, 2 H, *J* = 4.5

Hz), 2.76 (s, 3 H); <sup>13</sup>C NMR [75.5 MHz, CDCl<sub>3</sub>] δ 167.4, 162.2, 145.0, 142.1, 136.6, 133.9, 132.2, 25.8; HRMS (EI, HRDFMagSec) *m/z* 370.8900 (calcd for C<sub>14</sub>H<sub>11</sub>S<sup>80</sup>Se<sub>2</sub><sup>+</sup>: 370.8906).

#### **Synthesis of 4-(2,6-diphenyl-4H-thiopyran-4ylidene)acetaldehyde (17a)**

4-Methyl-2,6-di(phenyl)selenopyrylium hexafluorophosphate (0.200 g, 0.439 mmol), *N,N*-dimethylthioformamide (0.112 mL, 1.32 mmol) and Ac<sub>2</sub>O (4.0 mL) were added to a round-bottom flask and heated at 95 °C for 90 min. After cooling to ambient temperature CH<sub>3</sub>CN (4.0 mL) was added and the product precipitated by addition of ether and chilling overnight in the freezer. The iminium salt was isolated by filtration, and hydrolyzed by dissolving in CH<sub>3</sub>CN (4.0 mL), adding satd. aqueous NaHCO<sub>3</sub> (4.0 mL) and heating the mixture to 80 °C over a 15 min period. The reaction was maintained at this temperature for 0.5 h, after which the reaction was diluted with H<sub>2</sub>O (50 mL), the product extracted with CH<sub>2</sub>Cl<sub>2</sub> (3 × 30 mL), dried with MgSO<sub>4</sub>, and after concentration purified on SiO<sub>2</sub> with first a CH<sub>2</sub>Cl<sub>2</sub> and then a 10% EtOAc/CH<sub>2</sub>Cl<sub>2</sub> (R<sub>f</sub> = 0.70) eluent to yield 0.122 g (82%) of a orange oil: <sup>1</sup>H NMR [500 MHz, CDCl<sub>3</sub>] δ 10.11 (d, 1 H, *J* = 10.5 Hz), 8.32 (s, 1 H), 7.62-7.46 (m, 9 H), 7.00 (s, 1 H), 5.88 (d, 1 H, *J* = 11.0 Hz); <sup>13</sup>C NMR [75.5 MHz, CDCl<sub>3</sub>] δ 188.7, 148.4, 147.0, 146.0, 138.7, 138.4, 130.0, 129.9, 129.1, 126.6, 126.4, 126.4, 126.3, 125.7, 120.6, 120.5; HRMS (EI, HRDFMagSec) *m/z* 339.0292 (calcd for C<sub>19</sub>H<sub>14</sub>O<sup>80</sup>Se + H<sup>+</sup>: 339.0283).

#### **Synthesis of 4-(2,6-di(thiophene-2-yl)-4H-thiopyran-4ylidene)acetaldehyde (17b)**

4-Methyl-2,6-di(thiophen-2-yl)thiopyrylium hexafluorophosphate (0.350 g, 0.833 mmol), *N,N*-dimethylthioformamide (0.213 mL, 2.50 mmol) and Ac<sub>2</sub>O (3.0 mL) were combined in a small round bottom flask and heated at 95 °C for 1 h. After cooling to ambient temperature an additional portion of Ac<sub>2</sub>O (2.0 mL) was added and the solution diluted with ether. The formed iminium salt was allowed to precipitate in the freezer overnight, and then isolated by filtration to yield a bright orange solid. This solid was dissolved in CH<sub>3</sub>CN (3.0 mL) and satd. aqueous NaHCO<sub>3</sub> (3.0 mL) was added. This mixture was heated to 80 °C over 15 min, and kept at that temperature for 0.5 h. After diluting with H<sub>2</sub>O (30 mL) the product was extracted with CH<sub>2</sub>Cl<sub>2</sub> (3 × 50 mL), dried with Na<sub>2</sub>SO<sub>4</sub> and purified on SiO<sub>2</sub> with a 10% EtOAc/CH<sub>2</sub>Cl<sub>2</sub> eluent (R<sub>f</sub> = 0.71) to yield a yellow oil that was recrystallized in CH<sub>2</sub>Cl<sub>2</sub>/hexanes to yield 0.219 g (87%) of a yellow crystalline solid, mp 143-144 °C: <sup>1</sup>H NMR [500 MHz, CDCl<sub>3</sub>] δ 9.84 (d, 1 H, *J* = 6.0 Hz), 8.26 (s, 1 H), 7.45-7.39 (m, 4 H), 7.13-7.11 (m, 2 H), 6.88 (s, 1 H), 5.72 (d, 1 H, *J* = 6.5 Hz); <sup>13</sup>C

NMR [75.5 MHz, CDCl<sub>3</sub>]  $\delta$  188.1, 146.4, 139.4, 139.1, 137.3, 136.7, 128.2, 127.8, 127.6, 126.3, 126.0, 122.5, 117.6, 117.5; HRMS (EI, HRDFMagSec)  $m/z$  302.9971 (calcd for C<sub>15</sub>H<sub>10</sub>OS<sub>3</sub>+H<sup>+</sup>: 302.9967).

#### Synthesis of 2-(2,6-di(selenophen-2-yl)-4*H*-thiopyran-4-ylidene)acetaldehyde (17c)

4-Methyl-2,6-di(selenophen-2-yl)thiopyrylium hexafluorophosphate (0.150 g, 0.291 mmol), *N,N*-dimethylthioformamide (74.3  $\mu$ L, 0.872 mmol) and Ac<sub>2</sub>O (2.0 mL) were added to a round-bottom flask and heated at 95 °C for 90 min. After cooling to ambient temperature, Ac<sub>2</sub>O (2.0 mL) was added and the product precipitated by addition of ether and chilling overnight in the freezer. The iminium salt was isolated by filtration, and hydrolyzed by dissolving in CH<sub>3</sub>CN (3.0 mL), adding satd. aqueous NaHCO<sub>3</sub> (3.0 mL) and heating the mixture to 80 °C over a 15 min period. The reaction was maintained at this temperature for ½ h, after which the reaction was diluted with H<sub>2</sub>O (30 mL), the product extracted with CH<sub>2</sub>Cl<sub>2</sub> (3  $\times$  20 mL), dried with MgSO<sub>4</sub>, and after concentration purified on SiO<sub>2</sub> with a 10% EtOAc/CH<sub>2</sub>Cl<sub>2</sub> (R<sub>f</sub> = 0.62) eluent to yield 80.3 mg (69%) of a brown solid, mp 145-146 °C: <sup>1</sup>H NMR [500 MHz, CDCl<sub>3</sub>]  $\delta$  9.95 (d, 1 H, *J* = 6.0 Hz), 8.21 (s, 1 H), 8.13-8.10 (m, 2 H), 7.62 (d, 1 H, *J* = 4.0 Hz), 7.57 (d, 1 H, *J* = 4.0 Hz), 7.36-7.33 (m, 2 H), 6.81 (s, 1 H), 5.72 (d, 1 H, *J* = 6.0 Hz); <sup>13</sup>C NMR [75.5 MHz, CDCl<sub>3</sub>]  $\delta$  188.1, 146.7, 144.9, 144.6, 139.5, 138.8, 133.5, 133.2, 130.6, 128.6, 128.3, 123.3, 118.5, 117.4; HRMS (ESI, HRDFMagSec)  $m/z$  398.8861 (calcd for C<sub>15</sub>H<sub>10</sub>OS<sup>80</sup>Se<sub>2</sub>+H<sup>+</sup>: 398.8856).

#### Synthesis of 4-((2,6-diphenyl-4*H*-thiopyran-4-ylidene)methyl)-2,6-di(thiophen-2-yl)thiopyrylium hexafluorophosphate (1)

4-Methyl-2,6-di(thiophen-2-yl)thiopyrylium hexafluorophosphate (50.0 mg, 0.119 mmol), 2,6-bis(phenyl)-4*H*-thiopyran-4-one (34.6 mg, 0.131 mmol) and Ac<sub>2</sub>O (2.0 mL) were heated for 5 min at 105 °C prior to cooling to ambient temperature, diluting with CH<sub>3</sub>CN (3.0 mL) and adding ether to precipitate the product. Yielded 77.6 mg (91%) of a copper bronze solid, mp 222-223 °C: <sup>1</sup>H NMR [500 MHz, CD<sub>2</sub>Cl<sub>2</sub>]  $\delta$  8.04 (br s, 2 H), 7.90 (br s, 2 H), 7.83 (d, 4 H, *J* = 8.0 Hz), 7.75-7.73 (m, 4 H), 7.70-7.63 (m, 6 H), 7.30 (t, 2 H, *J* = 4.5 Hz), 6.67 (s, 1 H);  $\lambda_{\max}$  (CH<sub>2</sub>Cl<sub>2</sub>) = 653 nm ( $\epsilon$  1.3  $\times$  10<sup>5</sup> M<sup>-1</sup>cm<sup>-1</sup>); 473 nm ( $\epsilon$  1.6  $\times$  10<sup>4</sup> M<sup>-1</sup>cm<sup>-1</sup>); 410 nm ( $\epsilon$  1.4  $\times$  10<sup>4</sup> M<sup>-1</sup>cm<sup>-1</sup>); HRMS (ESI, HRDFMagSec)  $m/z$  521.0518 (calcd for C<sub>31</sub>H<sub>21</sub>S<sub>4</sub><sup>+</sup>: 521.0521). **Anal.** Calcd for C<sub>31</sub>H<sub>21</sub>S<sub>4</sub>·PF<sub>6</sub>: C, 55.85; H, 3.17. Found: C, 55.90; H, 3.29.



### Synthesis of 4-((2,6-diphenyl-4*H*-selenopyran-4-ylidene)methyl)-2,6-di(thiophen-2-yl)thiopyrylium hexafluorophosphate (2)

4-Methyl-2,6-di(thiophen-2-yl)thiopyrylium hexafluorophosphate (50.0 mg, 0.119 mmol), 2,6-bis(phenyl)-4*H*-selenopyran-4-one (40.6 mg, 0.131 mmol) and Ac<sub>2</sub>O (2.0 mL) were heated for 5 min at 105 °C prior to cooling to ambient temperature, diluting with CH<sub>3</sub>CN (3.0 mL) and adding ether to precipitate the product. Yielded 77.6 mg (91%) of a copper bronze solid, mp 249-250 °C: <sup>1</sup>H NMR [500 MHz, CD<sub>2</sub>Cl<sub>2</sub>] δ 8.02 (br s, 2 H), 7.94 (s, 2 H), 7.78-7.75 (m, 8 H), 7.67-7.60 (m, 6 H), 7.30 (t, 2 H, *J* = 5.0 Hz), 6.76 (s, 1 H); λ<sub>max</sub> (CH<sub>2</sub>Cl<sub>2</sub>) = 676 nm (ε 1.3 × 10<sup>5</sup> M<sup>-1</sup>cm<sup>-1</sup>); 483 nm (ε 1.6 × 10<sup>4</sup> M<sup>-1</sup>cm<sup>-1</sup>); 422 nm (ε 1.5 × 10<sup>4</sup> M<sup>-1</sup>cm<sup>-1</sup>); HRMS (ESI, HRDFMagSec) *m/z* 568.9958 (calcd for C<sub>31</sub>H<sub>21</sub>S<sub>3</sub><sup>80</sup>Se<sup>+</sup>: 568.9965). **Anal.** Calcd for C<sub>31</sub>H<sub>21</sub>S<sub>3</sub>Se·PF<sub>6</sub>·½H<sub>2</sub>O: C, 51.53; H, 3.07. Found: C, 51.55; H, 3.01.

### Synthesis of 4-((2,6-diphenyl-4*H*-selenopyran-4-ylidene)methyl)-2,6-di(thiophen-2-yl)selenopyrylium hexafluorophosphate (3)

4-Methyl-2,6-di(thiophen-2-yl)selenopyrylium hexafluorophosphate (50.0 mg, 0.107 mmol), 2,6-bis(phenyl)-4*H*-selenopyran-4-one (36.6 mg, 0.118 mmol) and Ac<sub>2</sub>O (4.0 mL) were heated for 90 sec at 105 °C prior to cooling to ambient temperature, diluting with CH<sub>3</sub>CN (3.0 mL) and adding ether to precipitate the product. Product was purified on SiO<sub>2</sub> with a 10% EtOAc/CH<sub>2</sub>Cl<sub>2</sub> eluent (*R<sub>f</sub>* = 0.34) to yield 35.7 mg (44%) of a copper bronze solid, mp 243-244 °C: <sup>1</sup>H NMR [500 MHz, CD<sub>2</sub>Cl<sub>2</sub>] δ 8.06 (br s, 2 H), 7.93 (s, 2 H), 7.79 (d, 4 H, *J* = 7.5 Hz), 7.75 (d, 2 H, *J* = 5.5 Hz), 7.68-7.65 (m, 4 H), 7.62 (t, 4 H, *J* = 7.0 Hz), 7.29 (t, 2 H, *J* = 4.5 Hz), 6.86 (s, 1 H); λ<sub>max</sub> (CH<sub>2</sub>Cl<sub>2</sub>) = 699 nm (ε 1.5 × 10<sup>5</sup> M<sup>-1</sup>cm<sup>-1</sup>); 499 nm (ε 1.9 × 10<sup>4</sup> M<sup>-1</sup>cm<sup>-1</sup>); 428 nm (ε 1.8 × 10<sup>4</sup> M<sup>-1</sup>cm<sup>-1</sup>); HRMS (ESI, HRDFMagSec) *m/z* 616.9402 (calcd for C<sub>31</sub>H<sub>21</sub>S<sub>2</sub><sup>80</sup>Se<sub>2</sub><sup>+</sup>: 616.9410). **Anal.** Calcd for C<sub>31</sub>H<sub>21</sub>S<sub>2</sub>Se<sub>2</sub>·PF<sub>6</sub>: C, 48.96; H, 2.78. Found: C, 48.68; H, 2.76.

### Synthesis of 4-((2,6-di(thiophen-2-yl)-4*H*-thiopyran-4-ylidene)methyl)-2,6-di(thiophen-2-yl)thiopyrylium hexafluorophosphate (4)

4-Methyl-2,6-di(thiophen-2-yl)thiopyrylium hexafluorophosphate (50.0 mg, 0.119 mmol), 2,6-bis(thiophen-2-yl)-4*H*-thiopyran-4-one (36.2 mg, 0.131 mmol) and Ac<sub>2</sub>O (2.0 mL) were heated for 20 min at 105 °C prior to cooling to ambient temperature, diluting with CH<sub>3</sub>CN (3.0 mL) and

adding ether to precipitate the product. Yielded 78.6 mg (97%) of a copper bronze solid, mp >260 °C: <sup>1</sup>H NMR [500 MHz, CD<sub>2</sub>Cl<sub>2</sub>] δ 7.86 (br s, 4 H), 7.75 (d, 8 H, *J* = 4.5 Hz), 7.30 (t, 4 H, *J* = 4.5 Hz), 6.61 (s, 1 H); λ<sub>max</sub> (CH<sub>2</sub>Cl<sub>2</sub>) = 676 nm (ε 1.2 × 10<sup>5</sup> M<sup>-1</sup>cm<sup>-1</sup>); 480 nm (ε 2.7 × 10<sup>4</sup> M<sup>-1</sup>cm<sup>-1</sup>); HRMS (ESI, HRDFMagSec) *m/z* 532.9628 (calcd for C<sub>27</sub>H<sub>17</sub>S<sub>6</sub><sup>+</sup>: 532.9649). **Anal.** Calcd for C<sub>27</sub>H<sub>17</sub>S<sub>6</sub>·PF<sub>6</sub>: C, 47.78; H, 2.52. Found: C, 47.94; H, 2.44.

#### **Synthesis of 4-((2,6-di(thiophen-2-yl)-4*H*-thiopyran-4-ylidene)methyl)-2,6-di(thiophen-2-yl)selenopyrylium hexafluorophosphate (5)**

4-Methyl-2,6-di(thiophen-2-yl)thiopyrylium hexafluorophosphate (50.0 mg, 0.119 mmol), 2,6-bis(thiophen-2-yl)-4*H*-selenopyran-4-one (42.3 mg, 0.131 mmol) and Ac<sub>2</sub>O (2.0 mL) were heated for 5 min at 105 °C prior to cooling to ambient temperature, diluting with CH<sub>3</sub>CN (3.0 mL) and adding ether to precipitate the product. Yielded 83.2 mg (96%) of a copper bronze solid, mp 254-256 °C: <sup>1</sup>H NMR [500 MHz, CD<sub>2</sub>Cl<sub>2</sub>] δ 7.94 (s, 2 H), 7.89 (br s, 2 H), 7.83-7.87 (m, 6 H), 7.71 (dd, 2 H, *J* = 4.0, 1.0 Hz), 6.73 (s, 1 H); λ<sub>max</sub> (CH<sub>2</sub>Cl<sub>2</sub>) = 698 nm (ε 1.1 × 10<sup>5</sup> M<sup>-1</sup>cm<sup>-1</sup>); 493 nm (ε 2.5 × 10<sup>4</sup> M<sup>-1</sup>cm<sup>-1</sup>); HRMS (ESI, HRDFMagSec) *m/z* 580.9087 (calcd for C<sub>27</sub>H<sub>17</sub>S<sub>5</sub><sup>80</sup>Se<sup>+</sup>: 580.9094). **Anal.** Calcd for C<sub>27</sub>H<sub>17</sub>S<sub>5</sub>Se·PF<sub>6</sub>: C, 44.69; H, 2.36. Found: C, 44.76; H, 2.49.

#### **Synthesis of 4-((2,6-di(thiophen-2-yl)-4*H*-selenopyran-4-ylidene)methyl)-2,6-di(thiophen-2-yl)selenopyrylium hexafluorophosphate (6)**

4-Methyl-2,6-di(thiophen-2-yl)selenopyrylium hexafluorophosphate (50.0 mg, 0.107 mmol), 2,6-bis(thiophen-2-yl)-4*H*-selenopyran-4-one (37.9 mg, 0.118 mmol) and Ac<sub>2</sub>O (2.0 mL) were heated for 5 min at 105 °C prior to cooling to ambient temperature, diluting with CH<sub>3</sub>CN (3.0 mL) and adding ether to precipitate the product. Yielded 77.6 mg (94%) of a copper bronze solid, mp 233-234 °C: <sup>1</sup>H NMR [500 MHz, CD<sub>2</sub>Cl<sub>2</sub>] δ 7.92 (br s, 4 H), 7.79 (d, 4 H, *J* = 5.0 Hz), 7.74 (d, 4 H, *J* = 3.0 Hz), 7.33 (t, 4 H, *J* = 4.5 Hz), 6.82 (s, 1 H); λ<sub>max</sub> (CH<sub>2</sub>Cl<sub>2</sub>) = 723 nm (ε 1.3 × 10<sup>5</sup> M<sup>-1</sup>cm<sup>-1</sup>); 506 nm (ε 2.9 × 10<sup>4</sup> M<sup>-1</sup>cm<sup>-1</sup>); HRMS (ESI, HRDFMagSec) *m/z* 628.8533 (calcd for C<sub>27</sub>H<sub>17</sub>S<sub>4</sub><sup>80</sup>Se<sub>2</sub><sup>+</sup>: 628.8543). **Anal.** Calcd for C<sub>27</sub>H<sub>17</sub>S<sub>4</sub>Se<sub>2</sub>·PF<sub>6</sub>: C, 41.98; H, 2.22. Found: C, 41.69; H, 2.15.

**Synthesis of 4-((2,6-diphenyl-4*H*-thiopyran-4-ylidene)methyl)-2,6-di(selenophen-2-yl)thiopyrylium hexafluorophosphate (7)**

4-Methyl-2,6-diphenylthiopyrylium hexafluorophosphate (50.0 mg, 0.123 mmol), 2,6-di(selenophen-2-yl)-4*H*-thiopyran-4-one (50.1 mg, 0.135 mmol) and Ac<sub>2</sub>O (2.0 mL) were heated for 5 min at 105 °C prior to cooling to ambient temperature, diluting with CH<sub>3</sub>CN (3.0 mL) and adding ether to precipitate the product to yield 79.0 mg (85%) of a copper bronze solid, mp > 260 °C: <sup>1</sup>H NMR [500 MHz, CD<sub>2</sub>Cl<sub>2</sub>] δ 8.44 (d, 2 H, *J* = 5.0 Hz), 8.03 (br s, 2 H), 7.91 (d, 2 H, *J* = 4.0 Hz), 7.83-7.82 (m, 6 H), 7.69-7.62 (m, 6 H), 7.51 (t, 2 H, *J* = 5.0 Hz), 6.72 (s, 1 H); λ<sub>max</sub> (CH<sub>2</sub>Cl<sub>2</sub>) = 659 nm (ε 1.4 × 10<sup>5</sup> M<sup>-1</sup>cm<sup>-1</sup>); 484 nm (ε 1.8 × 10<sup>4</sup> M<sup>-1</sup>cm<sup>-1</sup>); 428 nm (ε 1.7 × 10<sup>4</sup> M<sup>-1</sup>cm<sup>-1</sup>); HRMS (ESI, HRDFMagSec) *m/z* 616.9397 (calcd for C<sub>31</sub>H<sub>21</sub>S<sub>2</sub><sup>80</sup>Se<sub>2</sub><sup>+</sup>: 616.9410). **Anal.** Calcd for C<sub>31</sub>H<sub>21</sub>S<sub>2</sub>Se<sub>2</sub>·PF<sub>6</sub>: C, 48.96; H, 2.78. Found: C, 49.09; H, 2.98.

**Synthesis of 4-((2,6-di(selenophen-2-yl)-4*H*-thiopyran-4-ylidene)methyl)-2,6-di(selenophen-2-yl)thiopyrylium hexafluorophosphate (8)**

4-Methyl-2,6-di(selenophen-2-yl)thiopyrylium hexafluorophosphate (50.0 mg, 96.9 μmol), 2,6-di(selenophen-2-yl)-4*H*-thiopyran-4-one (39.6 mg, 0.107 mmol) and Ac<sub>2</sub>O (2.0 mL) were heated for 5 min at 105 °C prior to cooling to ambient temperature, diluting with CH<sub>3</sub>CN (3.0 mL) and adding ether to precipitate the product to yield 64.2 mg (76%) of a copper bronze solid, mp > 260 °C: <sup>1</sup>H NMR [500 MHz, CD<sub>3</sub>CN] δ 8.48 (d, 4 H, *J* = 6.0 Hz), 7.93 (d, 4 H, *J* = 3.5 Hz), 7.74 (s, 4 H), 7.47 (t, 4 H, *J* = 5.0 Hz), 6.57 (s, 1 H); λ<sub>max</sub> (CH<sub>2</sub>Cl<sub>2</sub>) = 687 nm (ε 1.1 × 10<sup>5</sup> M<sup>-1</sup>cm<sup>-1</sup>); 491 nm (ε 2.8 × 10<sup>4</sup> M<sup>-1</sup>cm<sup>-1</sup>); HRMS (ESI, HRDFMagSec) *m/z* 724.7393 (calcd for C<sub>27</sub>H<sub>17</sub>S<sub>2</sub><sup>80</sup>Se<sub>4</sub><sup>+</sup>: 724.7427). **Anal.** Calcd for C<sub>27</sub>H<sub>17</sub>S<sub>2</sub>Se<sub>4</sub>·PF<sub>6</sub>: C, 37.43; H, 1.98. Found: C, 37.70; H, 2.06.

**Synthesis of 4-(3-(2,6-diphenyl-4*H*-selenopyran-4-ylidene)prop-1-enyl)-2,6-diphenylselenopyrylium hexafluorophosphate (9)<sup>S4</sup>**

4-Methyl-2,6-di(phenyl)selenopyrylium hexafluorophosphate (0.190 g, 0.417 mmol), 4-(2,6-diphenyl-4*H*-selenopyran-4-ylidene)acetaldehyde (0.155 g, 0.459 mmol) and Ac<sub>2</sub>O (3.0 mL) were combined in a round bottom flask and heated at 105 °C for 10 min. The reaction was cooled to ambient temperature, precipitated with ether, and the collected solid recrystallized from

CH<sub>3</sub>CN/ether to yield 0.278 g (86%) of a golden-green solid: <sup>1</sup>H NMR [500 MHz, CD<sub>2</sub>Cl<sub>2</sub>] δ 8.59 (t, 1 H, *J* = 13.5 Hz), 8.40-7.80 (br s, 4 H), 7.71 (d, 8 H, *J* = 7.0 Hz), 7.63-7.59 (m, 12 H), 6.85 (d, 2 H, *J* = 13.0 Hz); λ<sub>max</sub> (CH<sub>2</sub>Cl<sub>2</sub>) = 806 nm (ε = 2.5 × 10<sup>5</sup> M<sup>-1</sup>cm<sup>-1</sup>); LRMS (ESI) *m/z* 631.2 (calcd for C<sub>37</sub>H<sub>27</sub><sup>80</sup>Se<sub>2</sub><sup>+</sup> : 631.0). **Anal.** Calcd for C<sub>37</sub>H<sub>27</sub>Se<sub>2</sub>·PF<sub>6</sub>: C, 57.38; H, 3.51; F, 14.72. Found: C, 57.34; H, 3.48; F, 14.76.

#### **Synthesis of 4-(3-(2,6-diphenyl-4H-thiopyran-4-ylidene)prop-1-enyl)-2,6-diphenylselenopyrylium hexafluorophosphate (10)<sup>S4</sup>**

4-Methyl-2,6-di(phenyl)thiopyrylium hexafluorophosphate (0.128 g, 0.312 mmol), 4-(2,6-diphenyl-4H-selenopyran-4ylidene)acetaldehyde (0.157 g, 0.344 mmol) and Ac<sub>2</sub>O (2.0 mL) were combined in a round bottom flask and heated at 105 °C for 10 min. The reaction was cooled to ambient temperature, CH<sub>3</sub>CN (2.0 mL) was added and ether was used to precipitate product from solution to yield 0.196 g (86%) of a copper-bronze solid: <sup>1</sup>H NMR [500 MHz, CD<sub>2</sub>Cl<sub>2</sub>] δ 8.54 (t, 1 H, *J* = 13.0 Hz), 8.20-7.80 (br s, 4 H), 7.78 (d, 4 H, *J* = 8.0 Hz), 7.70 (d, 4 H, *J* = 7.5 Hz), 7.66-7.58 (m, 12 H), 6.78 (d, 2 H, *J* = 13.5 Hz); λ<sub>max</sub> (CH<sub>2</sub>Cl<sub>2</sub>) = 784 nm (ε 2.0 × 10<sup>5</sup> M<sup>-1</sup>cm<sup>-1</sup>); LRMS (ESI) *m/z* 583.3 (calcd for C<sub>37</sub>H<sub>27</sub>S<sup>80</sup>Se<sup>+</sup> : 583.1). **Anal.** Calcd for C<sub>39</sub>H<sub>34</sub>O<sub>3</sub>Se<sub>2</sub>·PF<sub>6</sub>: C, 61.08; H, 3.74. Found: C, 61.10; H, 3.68.

#### **Synthesis of 4-(3-(2,6-dithiophen-2-yl-4H-thiopyran-4-ylidene)prop-1-enyl)-2,6-diphenylselenopyrylium hexafluorophosphate (11)**

4-Methyl-2,6-di(phenyl)selenopyrylium hexafluorophosphate (0.102 g, 0.225 mmol), 4-(2,6-(thiophene-2-yl)-4H-thiopyran-4ylidene)acetaldehyde (75.0 mg, 0.248 mmol) and Ac<sub>2</sub>O (3.0 mL) were combined in a round bottom flask and heated at 105 °C for 5 min. The reaction was cooled to ambient temperature, precipitated with ether, and the collected solid recrystallized from CH<sub>3</sub>CN/ether to yield 0.145 g (87%) of a bronze solid, mp 229-231 °C: <sup>1</sup>H NMR [500 MHz, CD<sub>2</sub>Cl<sub>2</sub>] δ 8.46 (t, 1 H, *J* = 13.0 Hz), 7.71-7.58 (m, 18 H), 7.26 (t, 2 H, *J* = 4.0 Hz), 6.77 (d, 1 H, *J* = 13.0 Hz), 6.70 (d, 1 H, *J* = 14.0 Hz); λ<sub>max</sub> (CH<sub>2</sub>Cl<sub>2</sub>) = 810 nm (ε 2.5 × 10<sup>5</sup> M<sup>-1</sup>cm<sup>-1</sup>); HRMS (ESI, HRDFMagSec) *m/z* 595.0125 (calcd for C<sub>33</sub>H<sub>23</sub>S<sub>3</sub><sup>80</sup>Se<sup>+</sup> : 595.0122). **Anal.** Calcd for C<sub>33</sub>H<sub>23</sub>S<sub>3</sub>Se·PF<sub>6</sub>: C, 53.59; H, 3.13; F, 15.41. Found: C, 53.79; H, 3.13; F, 15.19.

**Synthesis of 4-(3-(2,6-dithiophen-2-yl-4H-thiopyran-4-ylidene)prop-1-enyl)-2,6-diphenylthiopyrylium hexafluorophosphate (12)**

4-Methyl-2,6-diphenylthiopyrylium hexafluorophosphate (30.0 mg, 73.0  $\mu\text{mol}$ ), 4-(2,6-(thiophene-2-yl)-4H-thiopyran-4ylidene)acetaldehyde (24.4 mg, 81.0  $\mu\text{mol}$ ) and  $\text{Ac}_2\text{O}$  (1.0 mL) were combined in a round bottom flask and heated at 105  $^\circ\text{C}$  for 5 min. The reaction was cooled to ambient temperature,  $\text{CH}_3\text{CN}$  (4.0 mL) was added and ether was used to precipitate product from solution to yield 45.0 mg (88%) of a bronze solid, mp > 260  $^\circ\text{C}$ :  $^1\text{H NMR}$  [500 MHz,  $\text{CD}_2\text{Cl}_2$ ]  $\delta$  8.44 (t, 1 H,  $J = 13.0$  Hz), 8.40-7.80 (br s, 4 H), 7.78 (d, 4 H,  $J = 7.0$  Hz), 7.67-7.59 (m, 10 H), 7.24 (t, 2 H,  $J = 4.5$  Hz), 6.71 (d, 1 H,  $J = 13.0$  Hz), 6.63 (d, 1 H,  $J = 13.5$  Hz);  $\lambda_{\text{max}}$  ( $\text{CH}_2\text{Cl}_2$ ) = 789 nm ( $\epsilon 2.2 \times 10^5 \text{ M}^{-1}\text{cm}^{-1}$ ); HRMS (ESI, HRDFMagSec)  $m/z$  547.0674 (calcd for  $\text{C}_{33}\text{H}_{23}\text{S}_4^+$ : 547.0677). **Anal.** Calcd for  $\text{C}_{33}\text{H}_{23}\text{S}_4 \cdot \text{PF}_6$ : C, 57.21; H, 3.35. Found: C, 56.97; H, 3.36.

**Synthesis of 4-(3-(2,6-dithiophen-2-yl-4H-thiopyran-4-ylidene)prop-1-enyl)-(2,6-dithiophen-2-yl)thiopyrylium hexafluorophosphate (13)**

4-Methyl-2,6-di(thiophen-2-yl)thiopyrylium hexafluorophosphate (11.0 mg, 26.2  $\mu\text{mol}$ ), 4-(2,6-(thiophene-2-yl)-4H-thiopyran-4ylidene)acetaldehyde (9.5 mg, 31.4  $\mu\text{mol}$ ) and  $\text{Ac}_2\text{O}$  (1.0 mL) were combined in a round bottom flask and heated at 105  $^\circ\text{C}$  for 5 min. The reaction was cooled to ambient temperature,  $\text{CH}_2\text{Cl}_2$  (2.0 mL) was added and ether was used to precipitate product from solution to yield 17.8 mg (94%) of a bronze solid, mp > 260  $^\circ\text{C}$ :  $^1\text{H NMR}$  [500 MHz,  $\text{CD}_3\text{CN}$ ]  $\delta$  8.32 (t, 1 H,  $J = 13.5$  Hz), 7.68 (d, 2 H,  $J = 4$  Hz), 7.56 (br s, 4 H) 7.14 (t, 4 H,  $J = 4.5$  Hz), 6.48 (d, 2 H,  $J = 13.0$  Hz);  $\lambda_{\text{max}}$  ( $\text{CH}_2\text{Cl}_2$ ) = 813 nm ( $\epsilon 2.8 \times 10^5 \text{ M}^{-1}\text{cm}^{-1}$ ); HRMS (ESI, HRDFMagSec)  $m/z$  558.9805 (calcd for  $\text{C}_{29}\text{H}_{19}\text{S}_6^+$ : 558.9806). **Anal.** Calcd for  $\text{C}_{29}\text{H}_{19}\text{S}_6 \cdot \text{PF}_6$ : C, 49.42; H, 2.72. Found: C, 49.19; H, 2.79.

**Synthesis of 4-(3-(2,6-di(selenophen-2-yl)-4H-thiopyran-4-ylidene)prop-1-en-1-yl)-2,6-di(selenophen-2-yl)thiopyrylium hexafluorophosphate (14)**

4-Methyl-2,6-di(selenophen-2-yl)thiopyrylium hexafluorophosphate (47.1 mg, 91.4  $\mu\text{mol}$ ), 2-(2,6-di(selenophen-2-yl)-4H-thiopyran-4-ylidene)acetaldehyde (47.1 mg, 0.101 mmol) and  $\text{Ac}_2\text{O}$  (2.0 mL) were heated for 5 min at 105  $^\circ\text{C}$  prior to cooling to ambient temperature, diluting with

CH<sub>3</sub>CN (3.0 mL) and adding ether to precipitate the product to yield 71.0 mg (87%) of a copper bronze solid, mp 249-251 °C: <sup>1</sup>H NMR [500 MHz, CD<sub>3</sub>CN] δ 8.51-8.46 (m, 5 H), 7.88 (d, 4 H, *J* = 3.0 Hz), 7.71 (br s, 4 H), 7.46 (t, 4 H, *J* = 4.5 Hz), 6.62 (d, 2 H, *J* = 13.0 Hz); λ<sub>max</sub> (CH<sub>2</sub>Cl<sub>2</sub>) = 826 nm (ε 2.3 × 10<sup>5</sup> M<sup>-1</sup>cm<sup>-1</sup>); 750 nm (ε 5.2 × 10<sup>4</sup> M<sup>-1</sup>cm<sup>-1</sup>); 490 nm (ε 2.8 × 10<sup>4</sup> M<sup>-1</sup>cm<sup>-1</sup>); HRMS (ESI, HRDFMagSec) *m/z* 750.7560 (calcd for C<sub>29</sub>H<sub>19</sub>S<sub>2</sub><sup>80</sup>Se<sub>4</sub><sup>+</sup> : 750.7584). **Anal.** Calcd for C<sub>29</sub>H<sub>19</sub>S<sub>2</sub>Se<sub>4</sub>·PF<sub>6</sub>: C, 39.03; H, 2.15. Found: C, 39.28; H, 2.19.

## Synthesis of HGNs

The HGN synthesis was carried out under inert conditions using a standard Schlenk line to prevent the cobalt nanoparticles from prematurely oxidising. The method described was modified slightly from previous reports.<sup>S6, S7</sup> In a typical synthesis, cobalt chloride hexahydrate (100 μL, 0.4M; Fisher Scientific, 99.99%) and trisodium citrate dihydrate (550 μL, 0.1 M; Sigma-Aldrich, >99%) were added into deionised water (100 mL) and degassed several times (10 mins vacuum and 15 mins argon). Sodium borohydride (1 mL, 0.1 M; Fisher Scientific, 99%) was injected into the solution and allowed to react for a further 20 minutes (under constant argon flow) until hydrogen evolution ceased, indicating complete hydrolysis of the reductant. The solution was degassed again (8 min vacuum and 10 min argon) before chloroauric acid trihydrate (33 mL, 248 μM; Fisher Scientific, ACS reagent grade) was injected. This mixture was allowed to react for an additional 10 minutes under argon with vigorous stirring. Before being exposed to air, an obvious colour change from brown to green was observed. Finally, trisodium citrate (500 μL, 0.1 M) was added to stabilise the hollow gold nanoshell solution. Post synthesis, the HGN solution was concentrated through centrifugation (5000 x rpm) and the precipitate was re-dispersed in trisodium citrate solution (2mM) to give a final concentration of 2.97 nM. The HGNs prepared in this manner had a surface plasmon resonance at 720 nm, figure S2.

## Characterisation of HGNs

Investigation into the SERS properties of the HGNs were carried out by mixing concentrated HGN solution (270 μL) with Raman reporter solution; namely dyes 1-14, BPE and AZPY (40 μL, 10 μM; synthesised in-house or purchased from Sigma-Aldrich) and potassium chloride (300 μL, 30 mM; Sigma-Aldrich). The Raman measurements were performed using a SnRI portable

Raman spectrometer and a laser excitation wavelength of 1280 nm. All the measurements had a 3-7 second acquisition time and a laser power operating at 100 mW. Each sample was prepared in triplicate and 5 scans of each replicate were recorded. Furthermore, all the Raman spectra have been background corrected. For the SERS particle dilution studies, the optimum conditions were used (as stated above) and deionised water was added to obtain subsequent concentrations, over the concentration range 1.93 nM to 6 pM. All other experimental conditions were kept the same as those stated above. The limit of detection (LOD) was calculated to be 3 times the standard deviation of the blank, divided by the gradient of the straight line. Error bars represent one standard deviation resulting from 3 replicate samples and 5 scans of each, see table S1 for the LOD values for dyes 1-14 and figure S7 for associated LOD plots with error bars for dyes 1-13. The extinction spectrum for the HGNS with SPR at 720 nm was acquired using a Varian Cary 300 Bio-UV-Visible Spectrophotometer over the wavelength range 400-900 nm. While the extinction spectra showing the effects of aggregation were acquired using a Perkin Elmer Lambda 35 UV-Vis Spectrometer with an extended wavelength range up to 1100 nm.

### **Chemometrics**

Principal component analysis (PCA) was performed to assess the reproducibility and separation of individual features within the data set using Matlab software version R2012a (The MathWorks, Natick, MA, USA). PCA reduces the dimensionality of the SERS data, making it easier to identify any variations in the spectra.<sup>S8, S9</sup> PCA was carried out on 14 data sets, consisting of the spectra obtained from each individual dye experiment.

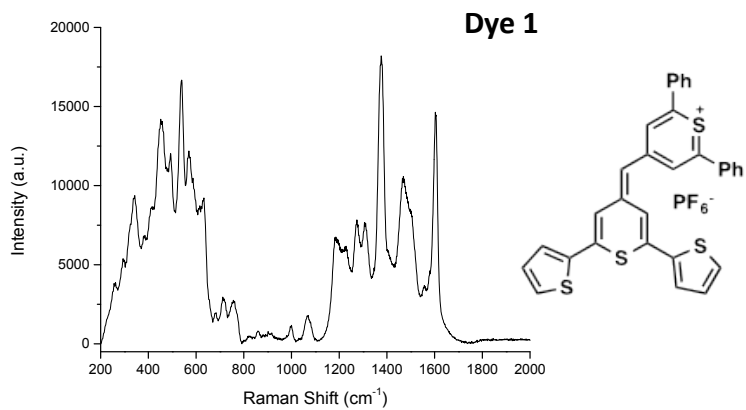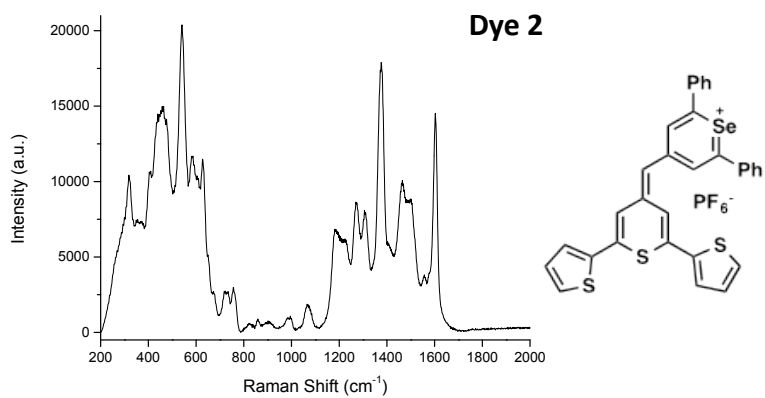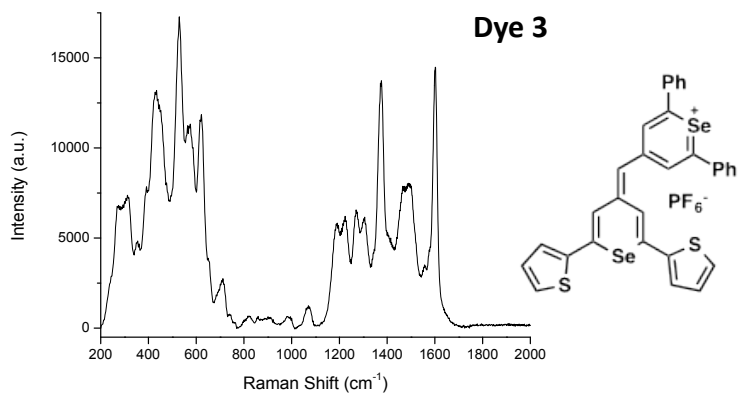



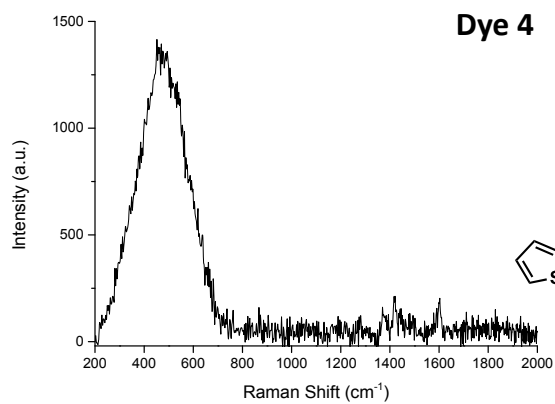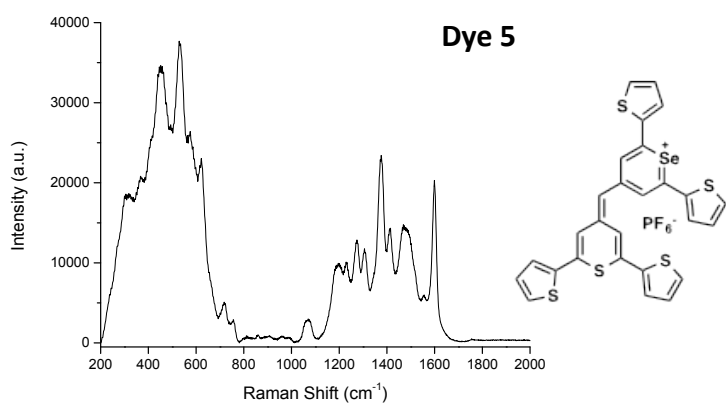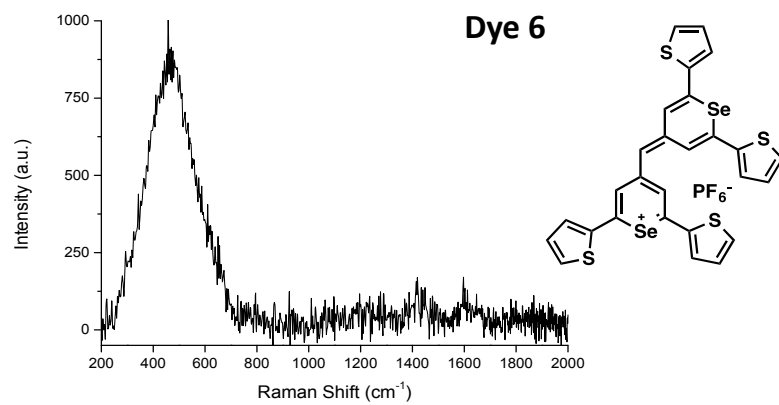

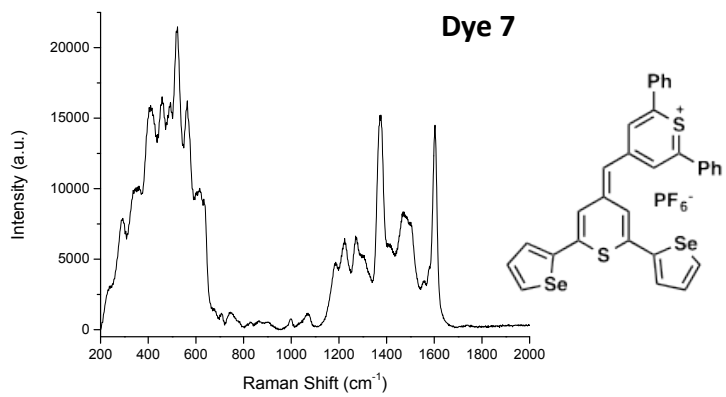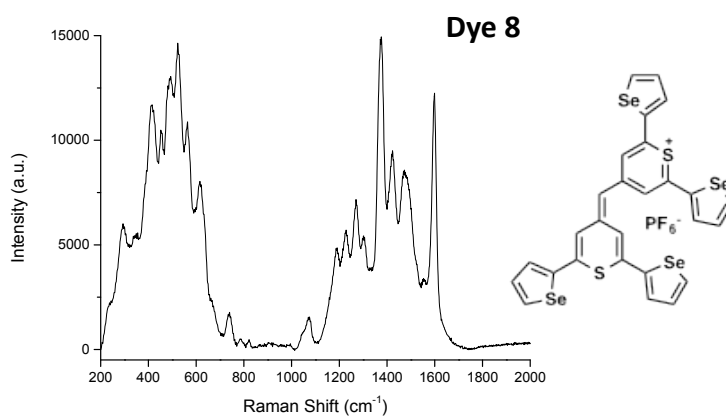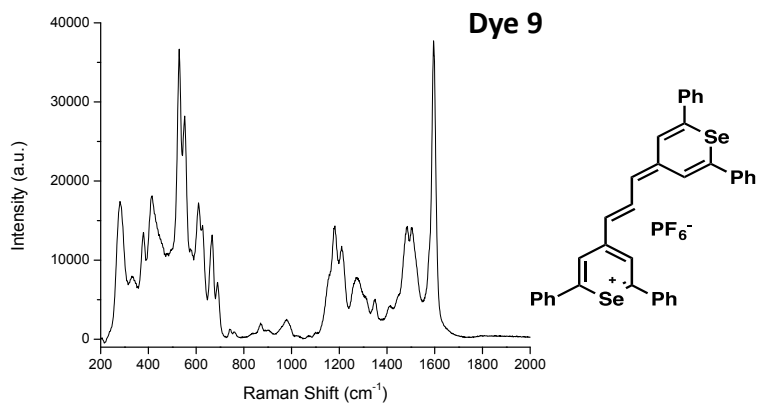

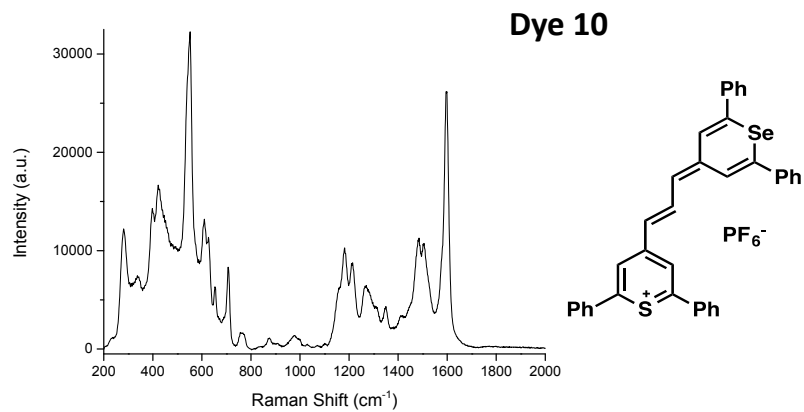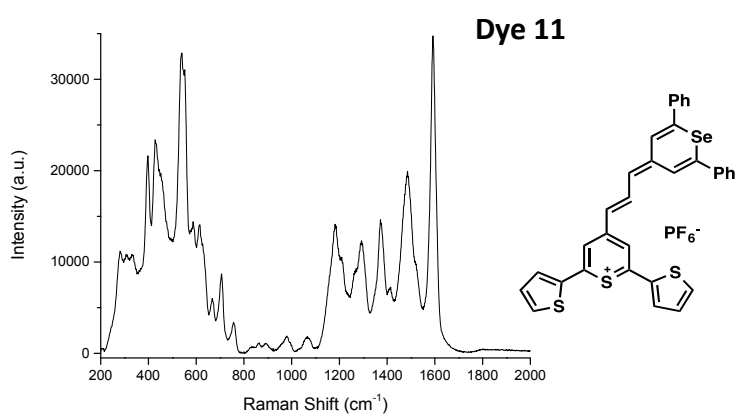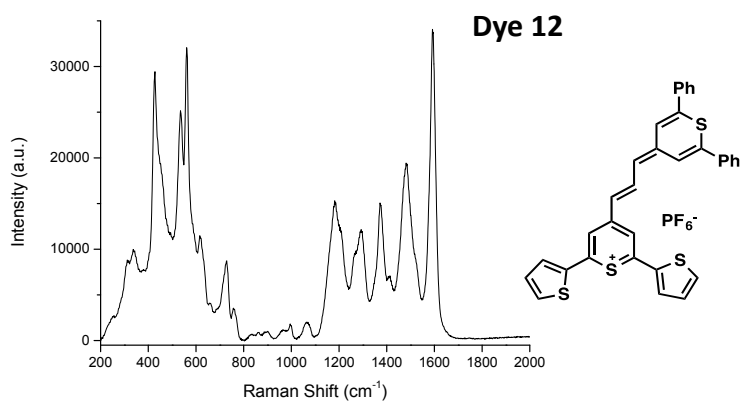

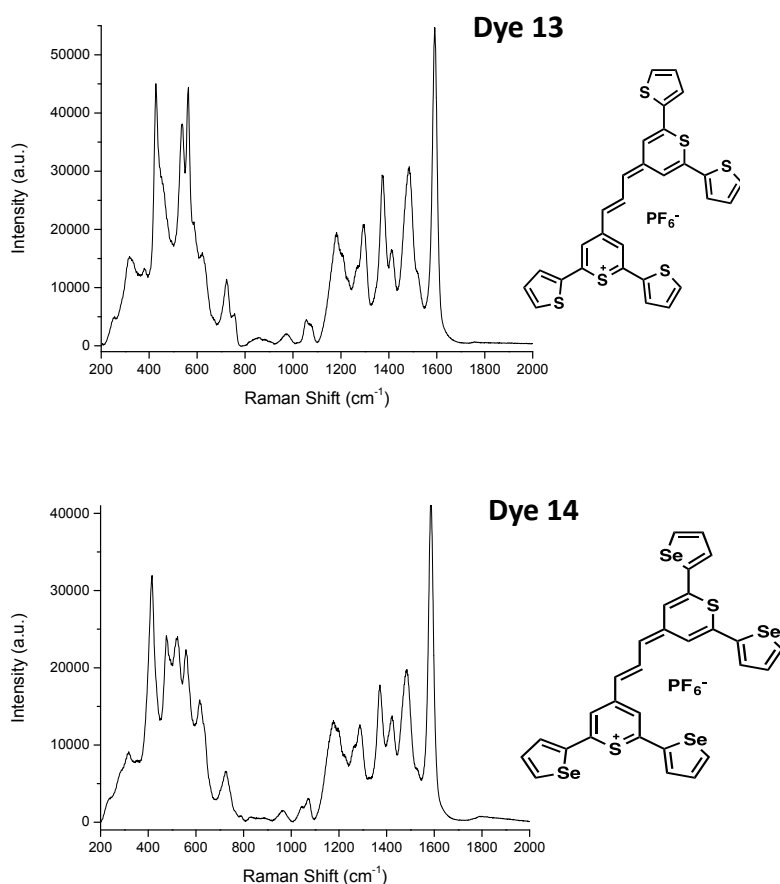

**Figure S1.** SERS spectra and structures of dyes 1-14. The dyes with a concentration of 10  $\mu\text{M}$  were analysed with HGNs (SPR recorded at 720 nm) and KCl. A laser excitation of 1280 nm and an exposure time of 7 seconds were employed in this analysis, with the exception of dye 14 which had an acquisition time of 3 seconds. All spectra have been background corrected.

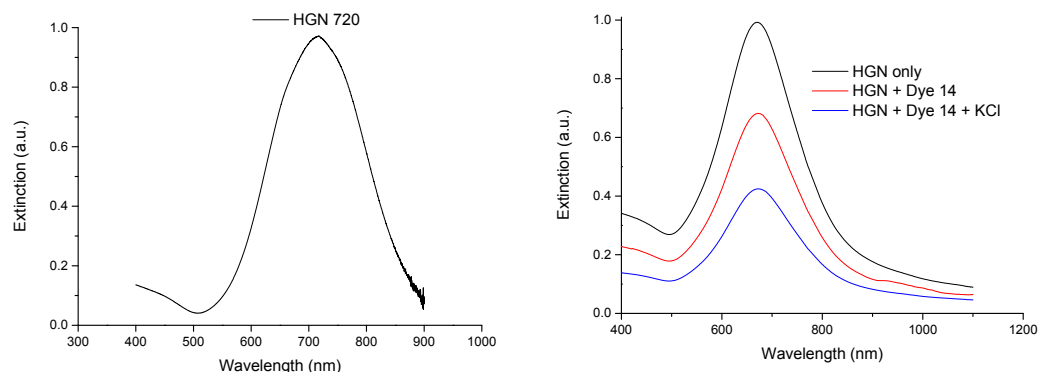

**Figure S2.** a) Extinction spectrum showing the SPR of the HGNs at 720 nm. b) Extended extinction spectra showing that the SPR does not shift upon aggregation. The black line highlights the HGN only spectrum; red line is HGN plus dye 14 (10  $\mu\text{M}$ ) and the blue line is HGN plus dye 14 and KCl salt (30 mM).

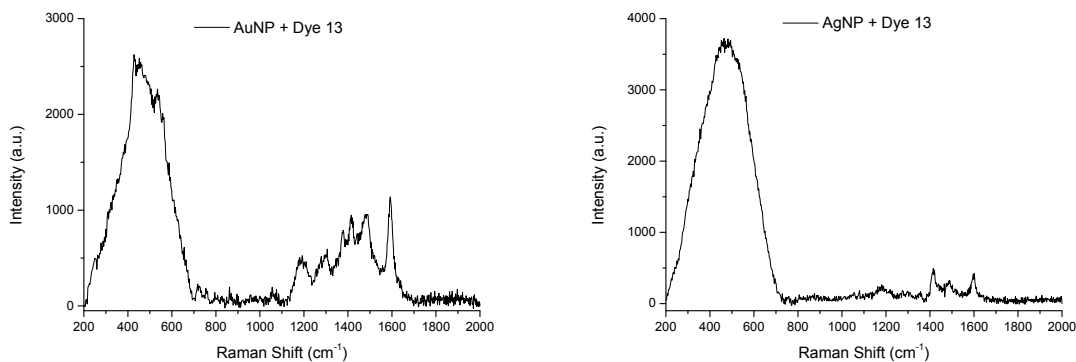

**Figure S3.** SERS spectra for dye **13** with gold and silver nanoparticles and aggregated with KCl. A laser excitation of 1280 nm and an exposure time of 7 seconds were employed in this analysis. All spectra have been background corrected.

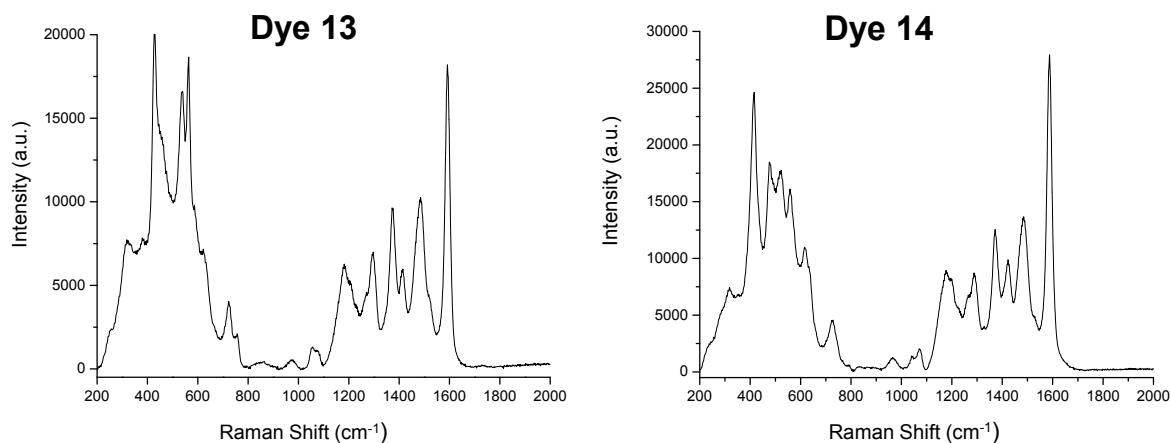

**Figure S4.** Unaggregated SERS spectra of dyes **13** and **14** analyzed with HGNs (SPR recorded at 720 nm) and deionised water. A laser excitation of 1280 nm and an exposure time of 7 seconds were employed in this analysis. All spectra have been background corrected.

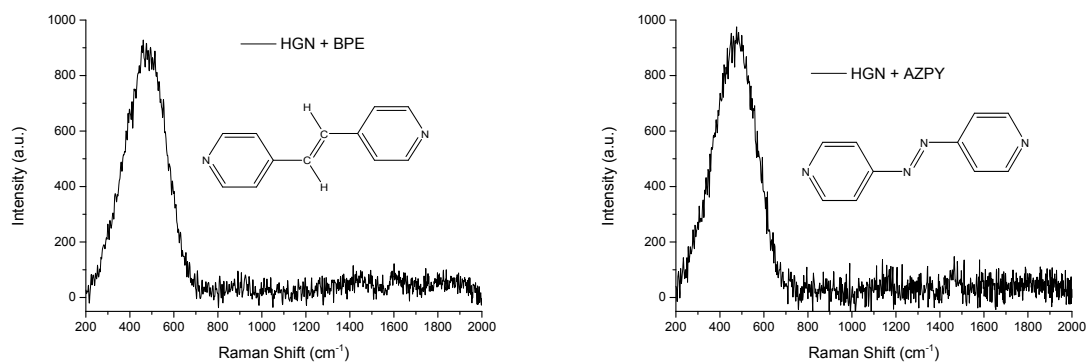

**Figure S5.** SERS spectra and structures of commercial dyes BPE and AZPY with HGNs (SPR recorded at 720 nm) and KCl. A laser excitation of 1280 nm and an exposure time of 7 seconds were employed in this analysis. All spectra have been background corrected.

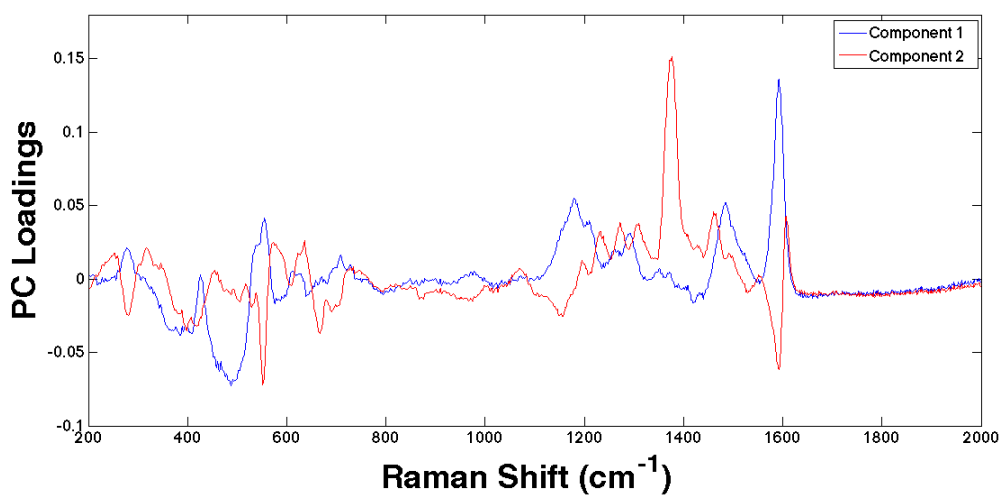

**Figure S6.** PC Loadings plots showing the Raman peaks that are responsible for the classification of the dyes across components 1 and 2.

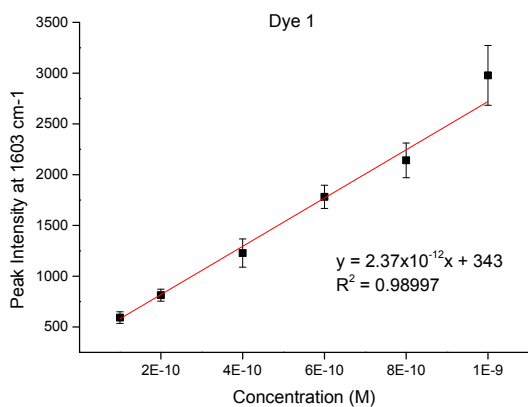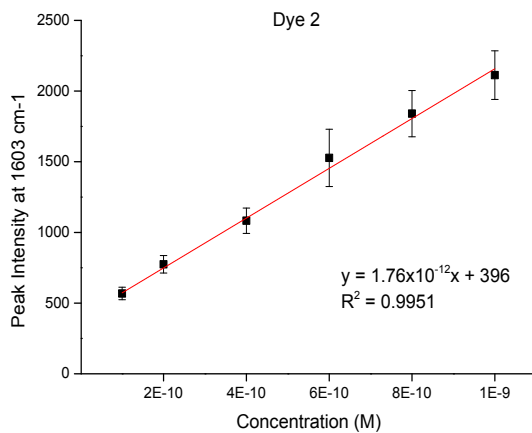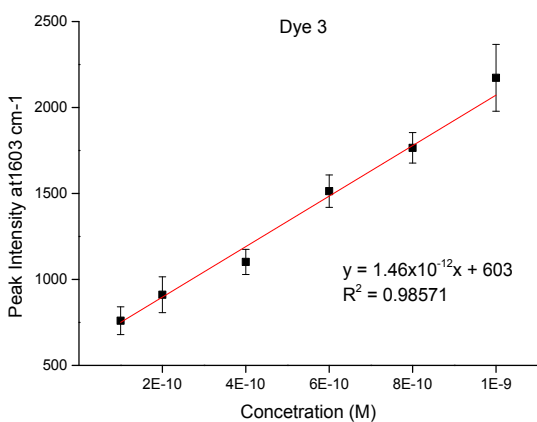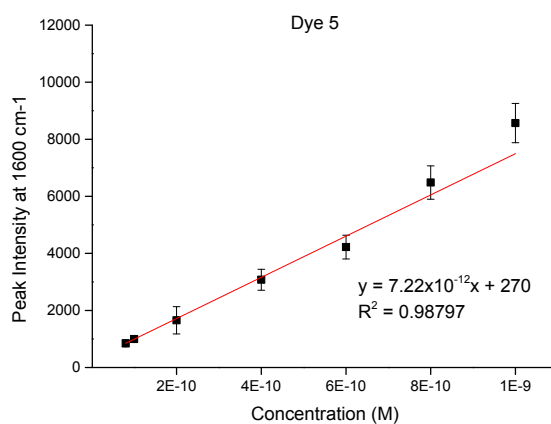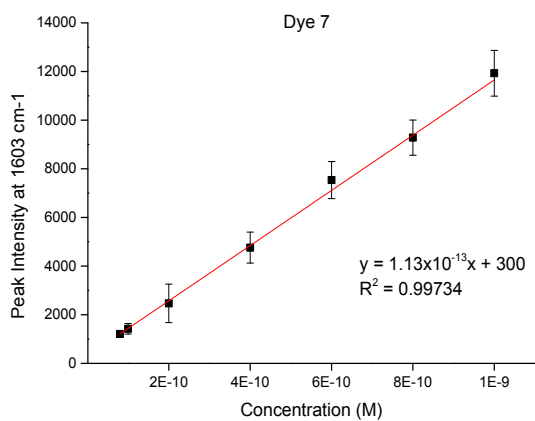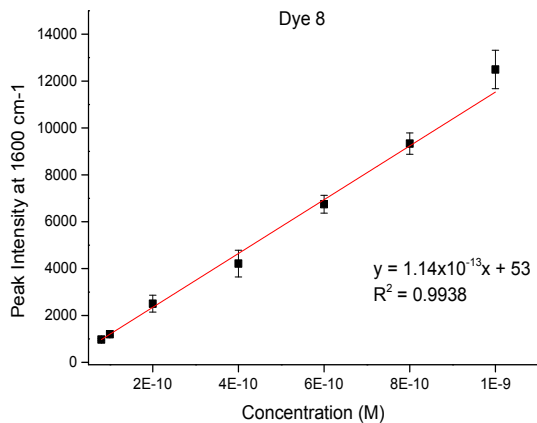

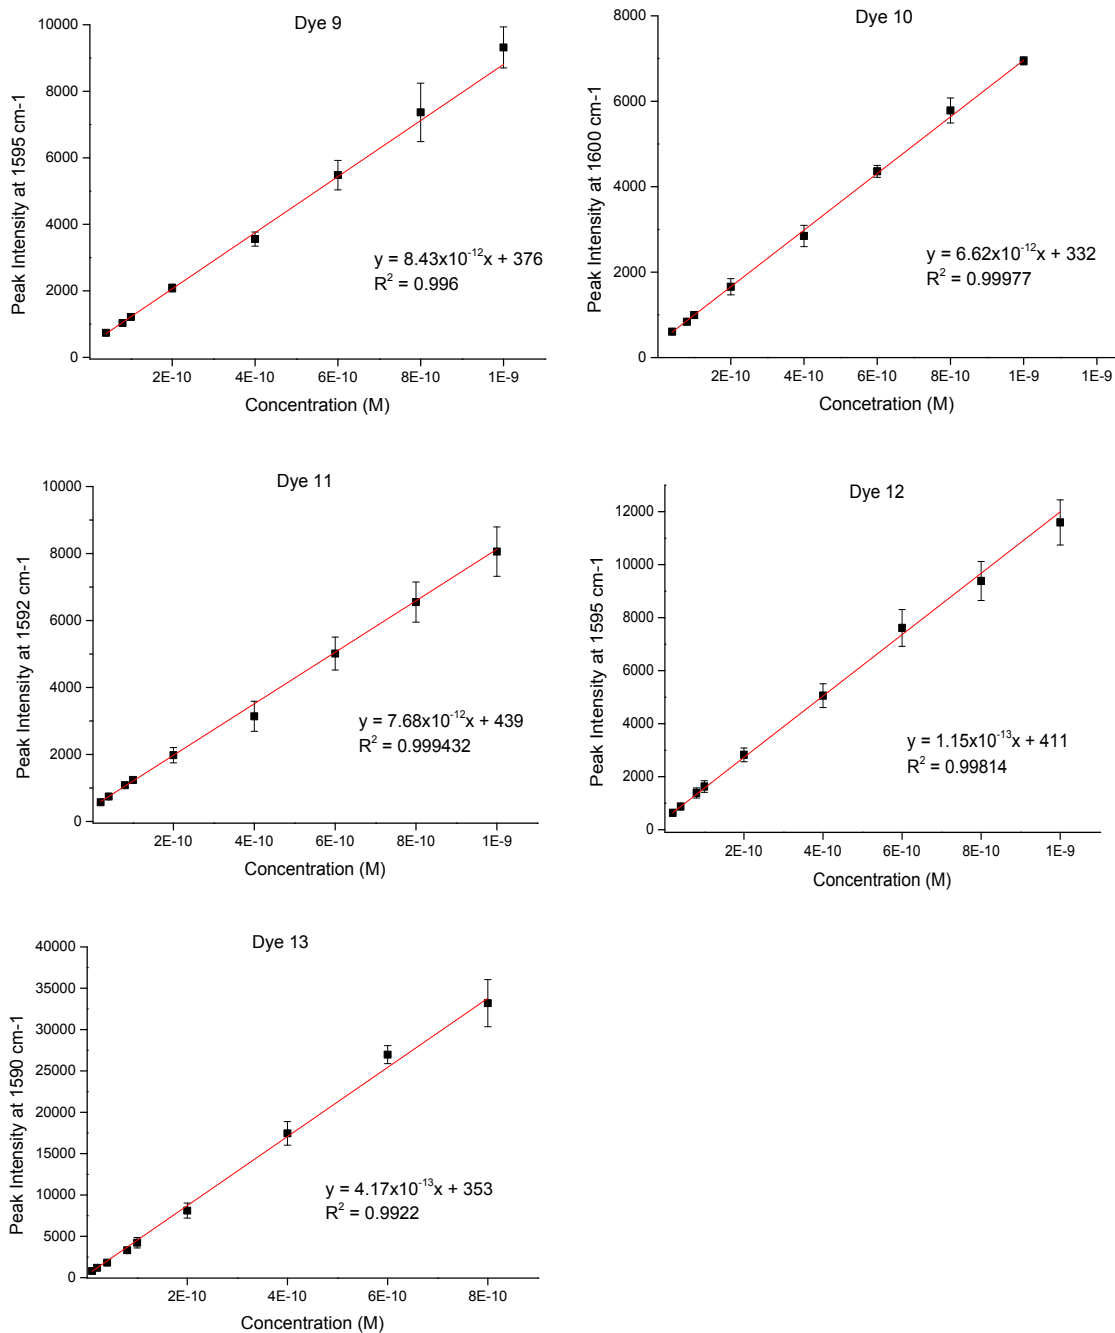

**Figure S7.** SERS particle dilution studies for dye **1-13** with HGNS and KCl over the concentration range 1.93 nM to 6 pM. Dyes **4 and 6** were not analysed due to their weak SERS response at the optimum concentration. A laser excitation of 1280 nm and an exposure time of 7 seconds were employed in this analysis. Error bars represent one standard deviation resulting from 3 replicate samples and 5 scans of each.



## References

- S1. K. Leonard, M. Nelen, M. Raghu and M. R. Detty, *J. Heterocycl. Chem.*, 1999, **36**, 707-717.
- S2. M. A. Kudinova, A. D. Kachkovski, V. V. Kurdyukov and A. I. Tolmachev, *Dyes Pigm.*, 2000, **45**, 1-7.
- S3. M. R. Detty, J. M. McKelvey and H. R. Luss, *Organometallics*, 1988, **7**, 1131-1147.
- S4. M. R. Detty and B. J. Murray, *J. Org. Chem.*, 1982, **47**, 5235-5239.
- S5. S. Kim, T. Y. Ohulchansky, A. Baev and P. N. Prasad, *J. Mater. Chem.*, 2009, **19**, 3181-3188.
- S6. A. M. Schwartzberg, T. Y. Olson, C. E. Talley and J. Z. Zhang, *The Journal of Physical Chemistry B*, 2006, **110**, 19935-19944.
- S7. H.-n. Xie, I. A. Larmour, Y.-C. Chen, A. W. Wark, V. Tileli, D. W. McComb, K. Faulds and D. Graham, *Nanoscale*, 2013, **5**, 765-771.
- S8. D.-H. Kim, R. M. Jarvis, Y. Xu, A. W. Oliver, J. W. Allwood, L. Hampson, I. N. Hampson and R. Goodacre, *Analyst*, 2010, **135**, 1235-1244.
- S9. S. Mabbott, A. Eckmann, C. Casiraghi and R. Goodacre, *Analyst*, 2013, **138**, 118-122.

## Crystallographic details for the X-ray crystal structure of dye **14**

X-ray diffraction data was collected on a Bruker SMART APEX2 CCD diffractometer installed at a rotating anode source (Mo K $\alpha$  radiation,  $\lambda=0.71073$  Å), and equipped with an Oxford Cryosystems (Cryostream700) nitrogen gas-flow apparatus. The crystal was kept at 90 K during data collection. The data was collected by the rotation method with a 0.5° frame-width ( $\omega$  scan) and a 20 second exposure per frame. Five sets of data (360 frames in each set) were collected, nominally covering complete reciprocal space.

Using Olex2<sup>1</sup>, the structure was solved with the XS<sup>2</sup> structure solution program using Direct Methods and refined with the XL<sup>2</sup> refinement package using Least Squares minimisation. All non-hydrogen atoms were refined anisotropically. The asymmetric unit consists of one unique dye **14** molecule, one PF<sub>6</sub><sup>-</sup> counter-ion, and three acetonitrile solvent molecules. Over the course of approximately 2-3 weeks, the single crystals showed marked degradation, presumably from the loss of solvent molecules.

Three of the selenophene rings showed evidence of minor crystallographic disorder. For all three disordered rings, the minor species was restrained to be planar with bond lengths similar to the major species by using FLAT and SADI commands. In a pair-wise manner, thermal ellipsoids of the disordered atoms were restrained to be same using EADP. The final refined occupancies for the minor species of the three rings were calculated to be 0.0435(17), 0.0379(17), and 0.0745(18).

The coplanarity of the aromatic groups in dye **14** was assessed by calculating the angle between the mean plane of the aromatic groups. The mean plane for each group was calculated using only the non-hydrogen atoms of a given group (MPLN command in Olex2). The angle between sets of two mean planes was then calculated using the ESD command in Olex2. The results are shown in Figure S8.

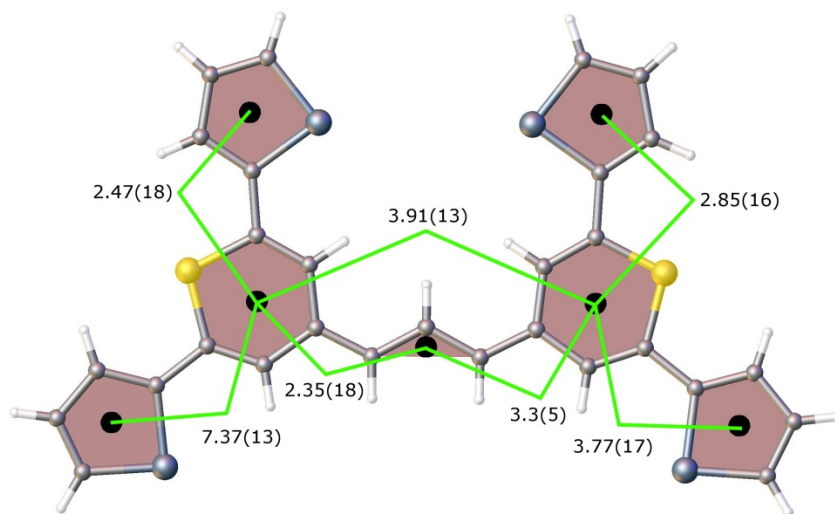

**Figure S8.** Diagram indicating the angle (in degrees given with standard deviation) between the calculated mean planes of the aromatic groups of dye **14** using single crystal X-ray diffraction data. The black dots indicate the centroid of the mean plane for each individual aromatic group.

| Table S1 Crystal data and structure refinement for Dye 14. |                                                                                               |
|------------------------------------------------------------|-----------------------------------------------------------------------------------------------|
| Identification code                                        | Dye 14                                                                                        |
| Empirical formula                                          | C <sub>35</sub> H <sub>28</sub> F <sub>6</sub> N <sub>3</sub> PS <sub>2</sub> Se <sub>4</sub> |
| Formula weight                                             | 1015.53                                                                                       |
| Temperature/K                                              | 90                                                                                            |
| Crystal system                                             | monoclinic                                                                                    |
| Space group                                                | P2 <sub>1</sub> /n                                                                            |
| a/Å                                                        | 19.6176(12)                                                                                   |
| b/Å                                                        | 7.5992(5)                                                                                     |
| c/Å                                                        | 25.2231(15)                                                                                   |
| α/°                                                        | 90                                                                                            |
| β/°                                                        | 93.7263(19)                                                                                   |
| γ/°                                                        | 90                                                                                            |
| Volume/Å <sup>3</sup>                                      | 3752.3(4)                                                                                     |
| Z                                                          | 4                                                                                             |
| ρ <sub>calc</sub> /g/cm <sup>3</sup>                       | 1.798                                                                                         |
| μ/mm <sup>-1</sup>                                         | 4.126                                                                                         |
| F(000)                                                     | 1984.0                                                                                        |
| Crystal size/mm <sup>3</sup>                               | 0.08 × 0.02 × 0.02                                                                            |
| Radiation                                                  | MoKα (λ = 0.71073)                                                                            |
| 2θ range for data collection/°                             | 3.236 to 54.302                                                                               |
| Index ranges                                               | -25 ≤ h ≤ 25, -9 ≤ k ≤ 9, -32 ≤ l ≤ 32                                                        |
| Reflections collected                                      | 69197                                                                                         |
| Independent reflections                                    | 8308 [R <sub>int</sub> = 0.1034, R <sub>sigma</sub> = 0.0651]                                 |
| Data/restraints/parameters                                 | 8308/22/502                                                                                   |
| Goodness-of-fit on F <sup>2</sup>                          | 1.087                                                                                         |
| Final R indexes [I ≥ 2σ (I)]                               | R <sub>1</sub> = 0.0513, wR <sub>2</sub> = 0.0967                                             |
| Final R indexes [all data]                                 | R <sub>1</sub> = 0.0911, wR <sub>2</sub> = 0.1075                                             |
| Largest diff. peak/hole / e Å <sup>-3</sup>                | 0.55/-0.64                                                                                    |

| Table S2 Fractional Atomic Coordinates (×10 <sup>4</sup> ) and Equivalent Isotropic Displacement Parameters (Å <sup>2</sup> ×10 <sup>3</sup> ) for Dye 14. U <sub>eq</sub> is defined as 1/3 of the trace of the orthogonalised U <sub>ij</sub> tensor. |   |   |   |       |
|---------------------------------------------------------------------------------------------------------------------------------------------------------------------------------------------------------------------------------------------------------|---|---|---|-------|
| Atom                                                                                                                                                                                                                                                    | x | y | z | U(eq) |

|     |            |             |            |           |
|-----|------------|-------------|------------|-----------|
| Se1 | 2296.0(2)  | 6056.5(7)   | 6420.2(2)  | 23.25(13) |
| S1  | 319.3(6)   | 4041.9(17)  | 6967.8(5)  | 19.3(3)   |
| S2  | 1528.6(6)  | 10994.8(17) | 3454.5(5)  | 19.7(3)   |
| P1  | 4294.9(7)  | 7944(2)     | 6141.9(6)  | 28.9(3)   |
| F1  | 4606.7(19) | 7478(5)     | 5592.6(13) | 51.2(10)  |
| F2  | 4393(2)    | 9976(5)     | 6031.5(13) | 48(1)     |
| F3  | 3972.5(18) | 8358(5)     | 6688.7(14) | 48.6(10)  |
| F4  | 4185(2)    | 5865(5)     | 6249.4(15) | 60.8(11)  |
| F5  | 3557.5(17) | 7986(5)     | 5860.6(15) | 51.3(10)  |
| F6  | 5019.7(18) | 7782(6)     | 6436.5(14) | 61.5(12)  |
| N1  | 1447(3)    | 10053(8)    | 5926(3)    | 56.2(16)  |
| N2  | 1765(3)    | 5100(8)     | 4965(2)    | 49.8(15)  |
| N3  | 3522(3)    | 5791(8)     | 3653(2)    | 54.6(16)  |
| C1  | 2886(3)    | 5342(7)     | 6977(2)    | 23.2(11)  |
| C2  | 2568(3)    | 4459(7)     | 7351(2)    | 27.5(13)  |
| C3  | 1847(3)    | 4262(7)     | 7251(2)    | 29.5(13)  |
| C4  | 1596(2)    | 5005(6)     | 6775.0(18) | 17(1)     |
| C5  | 889(2)     | 5026(6)     | 6557.7(18) | 17.1(10)  |
| C6  | 690(2)     | 5784(6)     | 6090.7(18) | 17(1)     |
| C7  | 10(2)      | 5915(6)     | 5863.9(18) | 15.9(10)  |
| C8  | -533(2)    | 5179(6)     | 6147.8(18) | 15.9(10)  |
| C9  | -468(2)    | 4373(6)     | 6624.5(18) | 15.7(10)  |
| C10 | -1047(2)   | 3716(6)     | 6902.8(19) | 19.3(11)  |
| C14 | -160(2)    | 6739(6)     | 5373.7(18) | 15.9(10)  |
| C15 | 305(2)     | 7561(6)     | 5063.7(17) | 15.5(10)  |
| C16 | 121(2)     | 8332(6)     | 4575.1(19) | 18.5(11)  |
| C20 | 340(2)     | 11374(6)    | 2881.8(19) | 20.5(11)  |
| C21 | 650(2)     | 10686(6)    | 3380.0(18) | 16.2(10)  |
| C22 | 297(2)     | 9889(6)     | 3752.9(18) | 16.6(10)  |
| C23 | 574(2)     | 9191(6)     | 4248.7(18) | 16.2(10)  |
| C24 | 1286(2)    | 9388(6)     | 4390.5(19) | 18(1)     |
| C25 | 1743(2)    | 10141(6)    | 4083.8(19) | 17.8(10)  |
| C26 | 2470(3)    | 10274(7)    | 4238.4(19) | 21.1(11)  |
| C30 | 1958(3)    | 10553(7)    | 6089(3)    | 35.4(14)  |
| C31 | 2633(3)    | 11159(8)    | 6284(2)    | 37.7(14)  |
| C32 | 2331(3)    | 4828(8)     | 5000(2)    | 31.1(13)  |
| C33 | 3065(3)    | 4524(8)     | 5058(3)    | 41.1(15)  |
| C34 | 3998(3)    | 6079(8)     | 3922(2)    | 37.0(14)  |
| C35 | 4614(3)    | 6427(9)     | 4273(2)    | 46.6(17)  |
| Se2 | -1944.4(3) | 4039.1(8)   | 6628.4(2)  | 22.34(17) |

|      |           |            |           |           |
|------|-----------|------------|-----------|-----------|
| Se3  | -574.4(3) | 11004.8(8) | 2676.2(2) | 24.77(17) |
| Se4  | 2837.3(3) | 9372.8(8)  | 4876.7(2) | 26.03(19) |
| C11  | -1021(4)  | 2837(10)   | 7377(3)   | 24.1(17)  |
| C12  | -1667(3)  | 2354(7)    | 7551(2)   | 26.2(13)  |
| C13  | -2211(3)  | 2862(7)    | 7222(2)   | 26.4(13)  |
| C17  | -436(3)   | 12360(8)   | 2082(2)   | 28.7(14)  |
| C18  | 216(3)    | 12928(7)   | 2074(2)   | 25.0(13)  |
| C19  | 643(3)    | 12373(8)   | 2508(2)   | 21.1(14)  |
| C27  | 2971(4)   | 11109(11)  | 3968(3)   | 39(2)     |
| C28  | 3634(3)   | 10968(9)   | 4213(3)   | 33.9(15)  |
| C29  | 3683(3)   | 10164(9)   | 4689(3)   | 27.9(16)  |
| Se2A | -1078(10) | 2700(30)   | 7540(6)   | 22.34(17) |
| Se3A | 762(9)    | 12140(30)  | 2340(6)   | 24.77(17) |
| Se4A | 3099(5)   | 10905(14)  | 3808(4)   | 26.03(19) |
| C11A | -1670(20) | 4110(90)   | 6660(30)  | 24.1(17)  |
| C12A | -2207(15) | 3650(140)  | 6980(40)  | 26.2(13)  |
| C13A | -2016(16) | 2930(130)  | 7460(40)  | 26.4(13)  |
| C17A | -80(30)   | 12490(140) | 1990(50)  | 28.7(14)  |
| C18A | -620(70)  | 12060(160) | 2270(40)  | 25.0(13)  |
| C19A | -352(16)  | 11430(110) | 2760(50)  | 21.1(14)  |
| C27A | 2800(40)  | 9800(70)   | 4719(17)  | 39(2)     |
| C28A | 3520(40)  | 9900(120)  | 4790(40)  | 33.9(15)  |
| C29A | 3770(40)  | 10430(90)  | 4340(30)  | 27.9(16)  |

| Table S3 Anisotropic Displacement Parameters ( $\text{\AA}^2 \times 10^3$ ) for Dye 14. The Anisotropic displacement factor exponent takes the form: $-2\pi^2[h^2a^*2U_{11}+2hka^*b^*U_{12}+\dots]$ . |          |          |          |          |          |           |
|-------------------------------------------------------------------------------------------------------------------------------------------------------------------------------------------------------|----------|----------|----------|----------|----------|-----------|
| Atom                                                                                                                                                                                                  | $U_{11}$ | $U_{22}$ | $U_{33}$ | $U_{23}$ | $U_{13}$ | $U_{12}$  |
| Se1                                                                                                                                                                                                   | 17.8(3)  | 26.0(3)  | 25.7(3)  | 7.2(2)   | -0.5(2)  | -2.5(2)   |
| S1                                                                                                                                                                                                    | 19.8(6)  | 19.2(6)  | 19.1(6)  | 4.7(5)   | 1.9(5)   | -2.1(5)   |
| S2                                                                                                                                                                                                    | 20.9(6)  | 21.3(6)  | 17.0(6)  | 4.7(5)   | 1.6(5)   | 0.2(6)    |
| P1                                                                                                                                                                                                    | 24.6(8)  | 36.8(9)  | 25.3(8)  | -2.7(7)  | 3.1(6)   | -2.6(7)   |
| F1                                                                                                                                                                                                    | 67(3)    | 54(2)    | 34(2)    | 0.2(18)  | 11.2(18) | 14(2)     |
| F2                                                                                                                                                                                                    | 72(3)    | 37(2)    | 35(2)    | -1.8(17) | 8.2(18)  | -19.6(19) |
| F3                                                                                                                                                                                                    | 57(2)    | 49(2)    | 42(2)    | -5.7(18) | 17.5(18) | -3.6(19)  |
| F4                                                                                                                                                                                                    | 78(3)    | 47(2)    | 60(3)    | 6(2)     | 23(2)    | 10(2)     |

|     |         |         |         |          |          |          |
|-----|---------|---------|---------|----------|----------|----------|
| F5  | 38(2)   | 51(2)   | 64(3)   | -11(2)   | -6.4(18) | 0.3(18)  |
| F6  | 35(2)   | 109(4)  | 40(2)   | 10(2)    | -3.4(16) | 3(2)     |
| N1  | 33(3)   | 46(4)   | 88(5)   | 19(3)    | -8(3)    | 5(3)     |
| N2  | 35(3)   | 54(4)   | 60(4)   | -5(3)    | -1(3)    | -7(3)    |
| N3  | 39(3)   | 77(5)   | 48(3)   | -6(3)    | 5(3)     | -9(3)    |
| C1  | 17(3)   | 26(3)   | 26(3)   | -2(2)    | -2(2)    | 4(2)     |
| C2  | 19(3)   | 36(3)   | 26(3)   | 5(2)     | -3(2)    | 1(2)     |
| C3  | 21(3)   | 35(3)   | 32(3)   | 8(3)     | -3(2)    | 4(2)     |
| C4  | 20(3)   | 15(2)   | 16(2)   | 0(2)     | -1(2)    | 1(2)     |
| C5  | 20(3)   | 14(2)   | 18(3)   | 1(2)     | 4(2)     | 1(2)     |
| C6  | 16(2)   | 17(3)   | 19(2)   | -1(2)    | 4.2(19)  | 0(2)     |
| C7  | 15(2)   | 15(2)   | 18(2)   | -5(2)    | 3.2(18)  | -1(2)    |
| C8  | 14(2)   | 15(2)   | 19(3)   | -1(2)    | 1.5(19)  | 2(2)     |
| C9  | 17(2)   | 13(2)   | 18(2)   | 0(2)     | 5.6(19)  | -3.3(19) |
| C10 | 25(3)   | 13(2)   | 21(3)   | -7(2)    | 9(2)     | -2(2)    |
| C14 | 17(2)   | 16(2)   | 14(2)   | -4(2)    | -2.0(19) | 0(2)     |
| C15 | 17(2)   | 17(2)   | 12(2)   | -4(2)    | 0.7(19)  | 2(2)     |
| C16 | 20(3)   | 16(2)   | 20(3)   | -4(2)    | 5(2)     | -1(2)    |
| C20 | 26(3)   | 17(3)   | 18(3)   | -3(2)    | 0(2)     | 7(2)     |
| C21 | 21(2)   | 14(2)   | 13(2)   | -3.7(19) | -2.0(19) | 4(2)     |
| C22 | 14(2)   | 15(2)   | 20(3)   | -5(2)    | -1.4(19) | 0(2)     |
| C23 | 18(2)   | 15(2)   | 16(2)   | -3(2)    | 4.0(18)  | 4(2)     |
| C24 | 19(2)   | 21(3)   | 15(2)   | 3(2)     | 1.0(19)  | -1(2)    |
| C25 | 23(3)   | 12(2)   | 19(3)   | -2(2)    | -1(2)    | 3(2)     |
| C26 | 21(3)   | 20(3)   | 23(3)   | 3(2)     | 2(2)     | -2(2)    |
| C30 | 30(3)   | 25(3)   | 51(4)   | 6(3)     | 3(3)     | 4(3)     |
| C31 | 31(3)   | 32(3)   | 50(4)   | -10(3)   | 4(3)     | 1(3)     |
| C32 | 36(4)   | 33(3)   | 24(3)   | -5(3)    | 1(3)     | -3(3)    |
| C33 | 37(4)   | 34(4)   | 53(4)   | -1(3)    | 9(3)     | 4(3)     |
| C34 | 36(3)   | 42(4)   | 35(3)   | 2(3)     | 14(3)    | -2(3)    |
| C35 | 54(4)   | 49(4)   | 37(4)   | -3(3)    | 2(3)     | 11(3)    |
| Se2 | 16.9(3) | 22.8(3) | 28.1(3) | -2.5(2)  | 7.2(2)   | -3.9(2)  |
| Se3 | 24.8(3) | 24.7(3) | 23.6(3) | 3.4(3)   | -7.2(2)  | -2.2(3)  |
| Se4 | 22.4(3) | 29.5(4) | 25.5(3) | 8.5(3)   | -4.1(2)  | -3.9(3)  |
| C11 | 30(4)   | 21(3)   | 22(4)   | -2(3)    | 11(3)    | -3(3)    |
| C12 | 36(4)   | 23(3)   | 21(3)   | -4(2)    | 15(3)    | -3(3)    |
| C13 | 24(3)   | 26(3)   | 31(3)   | -9(3)    | 18(3)    | -15(3)   |
| C17 | 40(4)   | 26(3)   | 19(3)   | 5(2)     | -5(3)    | 11(3)    |
| C18 | 38(3)   | 21(3)   | 16(3)   | 2(2)     | 5(3)     | 2(3)     |
| C19 | 26(3)   | 24(3)   | 15(3)   | 2(3)     | 10(2)    | 5(2)     |

|      |         |         |         |         |         |         |
|------|---------|---------|---------|---------|---------|---------|
| C27  | 39(5)   | 60(5)   | 17(4)   | -4(4)   | 1(3)    | 10(4)   |
| C28  | 15(3)   | 47(4)   | 40(4)   | 5(3)    | 6(3)    | -2(3)   |
| C29  | 15(3)   | 29(4)   | 39(5)   | 0(3)    | 0(3)    | 3(3)    |
| Se2A | 16.9(3) | 22.8(3) | 28.1(3) | -2.5(2) | 7.2(2)  | -3.9(2) |
| Se3A | 24.8(3) | 24.7(3) | 23.6(3) | 3.4(3)  | -7.2(2) | -2.2(3) |
| Se4A | 22.4(3) | 29.5(4) | 25.5(3) | 8.5(3)  | -4.1(2) | -3.9(3) |
| C11A | 30(4)   | 21(3)   | 22(4)   | -2(3)   | 11(3)   | -3(3)   |
| C12A | 36(4)   | 23(3)   | 21(3)   | -4(2)   | 15(3)   | -3(3)   |
| C13A | 24(3)   | 26(3)   | 31(3)   | -9(3)   | 18(3)   | -15(3)  |
| C17A | 40(4)   | 26(3)   | 19(3)   | 5(2)    | -5(3)   | 11(3)   |
| C18A | 38(3)   | 21(3)   | 16(3)   | 2(2)    | 5(3)    | 2(3)    |
| C19A | 26(3)   | 24(3)   | 15(3)   | 2(3)    | 10(2)   | 5(2)    |
| C27A | 39(5)   | 60(5)   | 17(4)   | -4(4)   | 1(3)    | 10(4)   |
| C28A | 15(3)   | 47(4)   | 40(4)   | 5(3)    | 6(3)    | -2(3)   |
| C29A | 15(3)   | 29(4)   | 39(5)   | 0(3)    | 0(3)    | 3(3)    |

| Table S4 Bond Lengths for Dye 14. |      |          |      |      |           |
|-----------------------------------|------|----------|------|------|-----------|
| Atom                              | Atom | Length/Å | Atom | Atom | Length/Å  |
| Se1                               | C1   | 1.843(5) | C20  | C19  | 1.374(8)  |
| Se1                               | C4   | 1.867(5) | C20  | Se3A | 1.742(15) |
| S1                                | C5   | 1.740(5) | C20  | C19A | 1.37(2)   |
| S1                                | C9   | 1.739(5) | C21  | C22  | 1.347(6)  |
| S2                                | C21  | 1.738(5) | C22  | C23  | 1.433(6)  |
| S2                                | C25  | 1.741(5) | C23  | C24  | 1.427(6)  |
| P1                                | F1   | 1.590(4) | C24  | C25  | 1.350(6)  |
| P1                                | F2   | 1.584(4) | C25  | C26  | 1.456(7)  |
| P1                                | F3   | 1.586(4) | C26  | Se4  | 1.852(5)  |
| P1                                | F4   | 1.620(4) | C26  | C27  | 1.387(9)  |
| P1                                | F5   | 1.570(4) | C26  | Se4A | 1.762(10) |
| P1                                | F6   | 1.566(4) | C26  | C27A | 1.39(2)   |
| N1                                | C30  | 1.126(7) | C30  | C31  | 1.457(8)  |
| N2                                | C32  | 1.127(7) | C32  | C33  | 1.455(8)  |
| N3                                | C34  | 1.137(8) | C34  | C35  | 1.474(9)  |
| C1                                | C2   | 1.342(7) | Se2  | C13  | 1.849(5)  |
| C2                                | C3   | 1.429(7) | Se3  | C17  | 1.853(6)  |

|     |      |           |      |      |          |
|-----|------|-----------|------|------|----------|
| C3  | C4   | 1.387(7)  | Se4  | C29  | 1.854(6) |
| C4  | C5   | 1.458(6)  | C11  | C12  | 1.416(9) |
| C5  | C6   | 1.346(6)  | C12  | C13  | 1.365(8) |
| C6  | C7   | 1.420(6)  | C17  | C18  | 1.350(8) |
| C7  | C8   | 1.434(6)  | C18  | C19  | 1.401(8) |
| C7  | C14  | 1.407(6)  | C27  | C28  | 1.407(9) |
| C8  | C9   | 1.348(6)  | C28  | C29  | 1.344(9) |
| C9  | C10  | 1.462(6)  | Se2A | C13A | 1.85(2)  |
| C10 | Se2  | 1.865(5)  | Se3A | C17A | 1.85(2)  |
| C10 | C11  | 1.369(8)  | Se4A | C29A | 1.85(2)  |
| C10 | Se2A | 1.785(14) | C11A | C12A | 1.41(2)  |
| C10 | C11A | 1.36(2)   | C12A | C13A | 1.36(2)  |
| C14 | C15  | 1.388(6)  | C17A | C18A | 1.35(2)  |
| C15 | C16  | 1.391(6)  | C18A | C19A | 1.40(2)  |
| C16 | C23  | 1.410(6)  | C27A | C28A | 1.40(2)  |
| C20 | C21  | 1.458(6)  | C28A | C29A | 1.34(2)  |
| C20 | Se3  | 1.855(5)  |      |      |          |

| Table S5 Bond Angles for Dye 14. |      |      |          |      |      |      |          |
|----------------------------------|------|------|----------|------|------|------|----------|
| Atom                             | Atom | Atom | Angle/°  | Atom | Atom | Atom | Angle/°  |
| C1                               | Se1  | C4   | 87.3(2)  | C19  | C20  | Se3  | 110.2(4) |
| C9                               | S1   | C5   | 103.0(2) | C19A | C20  | C21  | 124(5)   |
| C21                              | S2   | C25  | 103.2(2) | C19A | C20  | Se3A | 109(5)   |
| F1                               | P1   | F4   | 89.5(2)  | C20  | C21  | S2   | 113.6(4) |
| F2                               | P1   | F1   | 90.3(2)  | C22  | C21  | S2   | 122.4(4) |
| F2                               | P1   | F3   | 91.1(2)  | C22  | C21  | C20  | 124.0(4) |
| F2                               | P1   | F4   | 179.2(3) | C21  | C22  | C23  | 126.4(4) |
| F3                               | P1   | F1   | 178.4(2) | C16  | C23  | C22  | 117.6(4) |
| F3                               | P1   | F4   | 89.0(2)  | C16  | C23  | C24  | 123.1(4) |
| F5                               | P1   | F1   | 90.4(2)  | C24  | C23  | C22  | 119.3(4) |
| F5                               | P1   | F2   | 91.2(2)  | C25  | C24  | C23  | 125.3(4) |
| F5                               | P1   | F3   | 88.9(2)  | C24  | C25  | S2   | 123.4(4) |
| F5                               | P1   | F4   | 88.1(2)  | C24  | C25  | C26  | 123.5(4) |
| F6                               | P1   | F1   | 90.4(2)  | C26  | C25  | S2   | 113.2(3) |
| F6                               | P1   | F2   | 92.4(2)  | C25  | C26  | Se4  | 121.8(3) |
| F6                               | P1   | F3   | 90.2(2)  | C25  | C26  | Se4A | 124.5(5) |
| F6                               | P1   | F4   | 88.3(2)  | C27  | C26  | C25  | 127.8(5) |
| F6                               | P1   | F5   | 176.3(2) | C27  | C26  | Se4  | 110.4(4) |
| C2                               | C1   | Se1  | 112.7(4) | C27A | C26  | C25  | 128(4)   |



|      |     |      |          |      |      |      |          |
|------|-----|------|----------|------|------|------|----------|
| C1   | C2  | C3   | 115.4(5) | C27A | C26  | Se4A | 108(4)   |
| C4   | C3  | C2   | 113.7(5) | N1   | C30  | C31  | 177.7(7) |
| C3   | C4  | Se1  | 111.0(4) | N2   | C32  | C33  | 178.1(7) |
| C3   | C4  | C5   | 127.2(4) | N3   | C34  | C35  | 179.2(8) |
| C5   | C4  | Se1  | 121.8(3) | C13  | Se2  | C10  | 86.9(2)  |
| C4   | C5  | S1   | 113.8(3) | C17  | Se3  | C20  | 87.2(2)  |
| C6   | C5  | S1   | 122.9(4) | C26  | Se4  | C29  | 87.8(3)  |
| C6   | C5  | C4   | 123.3(4) | C10  | C11  | C12  | 114.4(7) |
| C5   | C6  | C7   | 126.4(4) | C13  | C12  | C11  | 114.8(5) |
| C6   | C7  | C8   | 118.7(4) | C12  | C13  | Se2  | 112.2(4) |
| C14  | C7  | C6   | 123.2(4) | C18  | C17  | Se3  | 112.2(4) |
| C14  | C7  | C8   | 118.1(4) | C17  | C18  | C19  | 114.2(5) |
| C9   | C8  | C7   | 126.3(4) | C20  | C19  | C18  | 116.0(5) |
| C8   | C9  | S1   | 122.6(4) | C26  | C27  | C28  | 114.5(6) |
| C8   | C9  | C10  | 123.5(4) | C29  | C28  | C27  | 115.9(7) |
| C10  | C9  | S1   | 113.9(3) | C28  | C29  | Se4  | 111.3(5) |
| C9   | C10 | Se2  | 121.4(4) | C10  | Se2A | C13A | 87(3)    |
| C9   | C10 | Se2A | 130.6(7) | C20  | Se3A | C17A | 88(5)    |
| C11  | C10 | C9   | 126.9(5) | C26  | Se4A | C29A | 90(3)    |
| C11  | C10 | Se2  | 111.7(4) | C10  | C11A | C12A | 112(2)   |
| C11A | C10 | C9   | 114(4)   | C13A | C12A | C11A | 116(2)   |
| C11A | C10 | Se2A | 115(4)   | C12A | C13A | Se2A | 110(4)   |
| C15  | C14 | C7   | 124.6(4) | C18A | C17A | Se3A | 114(10)  |
| C14  | C15 | C16  | 123.1(4) | C17A | C18A | C19A | 107(10)  |
| C15  | C16 | C23  | 125.1(5) | C20  | C19A | C18A | 121(10)  |
| C21  | C20 | Se3  | 121.9(4) | C26  | C27A | C28A | 121(8)   |
| C21  | C20 | Se3A | 127.0(7) | C29A | C28A | C27A | 109(10)  |
| C19  | C20 | C21  | 127.9(5) | C28A | C29A | Se4A | 113(7)   |

| Table S6 Torsion Angles for Dye 14. |     |     |      |           |     |      |      |      |           |
|-------------------------------------|-----|-----|------|-----------|-----|------|------|------|-----------|
| A                                   | B   | C   | D    | Angle/°   | A   | B    | C    | D    | Angle/°   |
| Se1                                 | C1  | C2  | C3   | -0.7(6)   | C24 | C25  | C26  | C27  | -175.9(6) |
| Se1                                 | C4  | C5  | S1   | -177.6(2) | C24 | C25  | C26  | Se4A | 168.8(6)  |
| Se1                                 | C4  | C5  | C6   | 0.4(7)    | C24 | C25  | C26  | C27A | -5(3)     |
| S1                                  | C5  | C6  | C7   | 0.4(7)    | C25 | S2   | C21  | C20  | 177.7(3)  |
| S1                                  | C9  | C10 | Se2  | 176.5(2)  | C25 | S2   | C21  | C22  | -2.1(5)   |
| S1                                  | C9  | C10 | C11  | -2.9(7)   | C25 | C26  | Se4  | C29  | -180.0(4) |
| S1                                  | C9  | C10 | Se2A | 2.2(11)   | C25 | C26  | C27  | C28  | -178.4(6) |
| S1                                  | C9  | C10 | C11A | 174(3)    | C25 | C26  | Se4A | C29A | -175(2)   |
| S2                                  | C21 | C22 | C23  | -0.2(7)   | C25 | C26  | C27A | C28A | 176(3)    |
| S2                                  | C25 | C26 | Se4  | -177.2(3) | C26 | Se4  | C29  | C28  | 0.3(5)    |
| S2                                  | C25 | C26 | C27  | 6.0(8)    | C26 | C27  | C28  | C29  | -4.5(10)  |
| S2                                  | C25 | C26 | Se4A | -9.4(7)   | C26 | Se4A | C29A | C28A | -2(3)     |
| S2                                  | C25 | C26 | C27A | 177(3)    | C26 | C27A | C28A | C29A | -2(4)     |
| C1                                  | Se1 | C4  | C3   | 0.2(4)    | Se2 | C10  | C11  | C12  | 0.7(7)    |
| C1                                  | Se1 | C4  | C5   | 179.8(4)  | Se2 | C10  | Se2A | C13A | -4(3)     |
| C1                                  | C2  | C3  | C4   | 0.9(7)    | Se2 | C10  | C11A | C12A | 23(20)    |
| C2                                  | C3  | C4  | Se1  | -0.7(6)   | Se3 | C20  | C21  | S2   | 173.5(2)  |
| C2                                  | C3  | C4  | C5   | 179.8(5)  | Se3 | C20  | C21  | C22  | -6.7(7)   |
| C3                                  | C4  | C5  | S1   | 1.8(7)    | Se3 | C20  | C19  | C18  | 1.6(6)    |
| C3                                  | C4  | C5  | C6   | 179.9(5)  | Se3 | C20  | Se3A | C17A | 12(3)     |
| C4                                  | Se1 | C1  | C2   | 0.3(4)    | Se3 | C20  | C19A | C18A | -94(28)   |
| C4                                  | C5  | C6  | C7   | -177.5(4) | Se3 | C17  | C18  | C19  | 0.3(7)    |
| C5                                  | S1  | C9  | C8   | 1.8(5)    | Se4 | C26  | C27  | C28  | 4.5(8)    |
| C5                                  | S1  | C9  | C10  | -177.6(3) | Se4 | C26  | Se4A | C29A | -6(2)     |
| C5                                  | C6  | C7  | C8   | -0.1(7)   | Se4 | C26  | C27A | C28A | 134(22)   |
| C5                                  | C6  | C7  | C14  | 179.6(5)  | C11 | C10  | Se2  | C13  | -0.3(5)   |
| C6                                  | C7  | C8  | C9   | 1.0(7)    | C11 | C10  | Se2A | C13A | -141(11)  |
| C6                                  | C7  | C14 | C15  | -2.1(7)   | C11 | C10  | C11A | C12A | 5(2)      |

|     |      |      |      |            |      |      |      |      |           |
|-----|------|------|------|------------|------|------|------|------|-----------|
| C7  | C8   | C9   | S1   | -2.0(7)    | C11  | C12  | C13  | Se2  | 0.6(7)    |
| C7  | C8   | C9   | C10  | 177.3(4)   | C17  | C18  | C19  | C20  | -1.3(8)   |
| C7  | C14  | C15  | C16  | 178.6(4)   | C19  | C20  | C21  | S2   | -7.8(7)   |
| C8  | C7   | C14  | C15  | 177.7(4)   | C19  | C20  | C21  | C22  | 172.0(5)  |
| C8  | C9   | C10  | Se2  | -2.9(6)    | C19  | C20  | Se3  | C17  | -1.1(4)   |
| C8  | C9   | C10  | C11  | 177.7(6)   | C19  | C20  | Se3A | C17A | -84(4)    |
| C8  | C9   | C10  | Se2A | -177.1(10) | C19  | C20  | C19A | C18A | 14(3)     |
| C8  | C9   | C10  | C11A | -5(3)      | C27  | C26  | Se4  | C29  | -2.7(5)   |
| C9  | S1   | C5   | C4   | 177.0(3)   | C27  | C26  | Se4A | C29A | 76(3)     |
| C9  | S1   | C5   | C6   | -1.1(5)    | C27  | C26  | C27A | C28A | -12(2)    |
| C9  | C10  | Se2  | C13  | -179.8(4)  | C27  | C28  | C29  | Se4  | 2.2(8)    |
| C9  | C10  | C11  | C12  | -179.8(5)  | Se2A | C10  | Se2  | C13  | -4.4(8)   |
| C9  | C10  | Se2A | C13A | 170(3)     | Se2A | C10  | C11  | C12  | 46(10)    |
| C9  | C10  | C11A | C12A | -172(2)    | Se2A | C10  | C11A | C12A | 1(2)      |
| C10 | Se2  | C13  | C12  | -0.2(4)    | Se3A | C20  | C21  | S2   | 10.1(10)  |
| C10 | C11  | C12  | C13  | -0.9(8)    | Se3A | C20  | C21  | C22  | -170.2(9) |
| C10 | Se2A | C13A | C12A | 2(4)       | Se3A | C20  | Se3  | C17  | -16.1(8)  |
| C10 | C11A | C12A | C13A | 1(3)       | Se3A | C20  | C19  | C18  | 91(3)     |
| C14 | C7   | C8   | C9   | -178.7(5)  | Se3A | C20  | C19A | C18A | -1(3)     |
| C14 | C15  | C16  | C23  | 179.5(4)   | Se3A | C17A | C18A | C19A | -1(3)     |
| C15 | C16  | C23  | C22  | 179.1(4)   | Se4A | C26  | Se4  | C29  | 10.9(5)   |
| C15 | C16  | C23  | C24  | -0.9(7)    | Se4A | C26  | C27  | C28  | -99(3)    |
| C16 | C23  | C24  | C25  | 177.5(5)   | Se4A | C26  | C27A | C28A | 1(2)      |
| C20 | C21  | C22  | C23  | -179.9(4)  | C11A | C10  | Se2  | C13  | -163(20)  |
| C20 | Se3  | C17  | C18  | 0.5(5)     | C11A | C10  | C11  | C12  | 3(3)      |
| C20 | Se3A | C17A | C18A | 0.1(15)    | C11A | C10  | Se2A | C13A | -2(3)     |
| C21 | S2   | C25  | C24  | 2.4(5)     | C11A | C12A | C13A | Se2A | -2(4)     |
| C21 | S2   | C25  | C26  | -179.5(3)  | C17A | C18A | C19A | C20  | 1(4)      |
| C21 | C20  | Se3  | C17  | 177.8(4)   | C19A | C20  | C21  | S2   | -174(4)   |
| C21 | C20  | C19  | C18  | -177.3(5)  | C19A | C20  | C21  | C22  | 6(4)      |
| C21 | C20  | Se3A | C17A | 177(3)     | C19A | C20  | Se3  | C17  | 75(28)    |
| C21 | C20  | C19A | C18A | -178(3)    | C19A | C20  | C19  | C18  | -10(3)    |
| C21 | C22  | C23  | C16  | -177.2(5)  | C19A | C20  | Se3A | C17A | 0.6(14)   |
| C21 | C22  | C23  | C24  | 2.8(7)     | C27A | C26  | Se4  | C29  | -38(23)   |
| C22 | C23  | C24  | C25  | -2.5(7)    | C27A | C26  | C27  | C28  | 9(2)      |
| C23 | C24  | C25  | S2   | -0.3(7)    | C27A | C26  | Se4A | C29A | 0.4(13)   |
| C23 | C24  | C25  | C26  | -178.3(5)  | C27A | C28A | C29A | Se4A | 2(4)      |
| C24 | C25  | C26  | Se4  | 0.9(7)     |      |      |      |      |           |

| Table S7 Atomic Occupancy for Dye 14. |                  |             |                  |             |                  |
|---------------------------------------|------------------|-------------|------------------|-------------|------------------|
| <b>Atom</b>                           | <b>Occupancy</b> | <b>Atom</b> | <b>Occupancy</b> | <b>Atom</b> | <b>Occupancy</b> |
| Se2                                   | 0.9565(17)       | Se3         | 0.9621(17)       | Se4         | 0.9255(18)       |
| C11                                   | 0.9565(17)       | H11         | 0.9565(17)       | C12         | 0.9565(17)       |
| H12                                   | 0.9565(17)       | C13         | 0.9565(17)       | H13         | 0.9565(17)       |
| C17                                   | 0.9621(17)       | H17         | 0.9621(17)       | C18         | 0.9621(17)       |
| H18                                   | 0.9621(17)       | C19         | 0.9621(17)       | H19         | 0.9621(17)       |
| C27                                   | 0.9255(18)       | H27         | 0.9255(18)       | C28         | 0.9255(18)       |
| H28                                   | 0.9255(18)       | C29         | 0.9255(18)       | H29         | 0.9255(18)       |
| Se2A                                  | 0.0435(17)       | Se3A        | 0.0379(17)       | Se4A        | 0.0745(18)       |
| C11A                                  | 0.0435(17)       | H11A        | 0.0435(17)       | C12A        | 0.0435(17)       |
| H12A                                  | 0.0435(17)       | C13A        | 0.0435(17)       | H13A        | 0.0435(17)       |
| C17A                                  | 0.0379(17)       | H17A        | 0.0379(17)       | C18A        | 0.0379(17)       |
| H18A                                  | 0.0379(17)       | C19A        | 0.0379(17)       | H19A        | 0.0379(17)       |
| C27A                                  | 0.0745(18)       | H27A        | 0.0745(18)       | C28A        | 0.0745(18)       |
| H28A                                  | 0.0745(18)       | C29A        | 0.0745(18)       | H29A        | 0.0745(18)       |

(1) Dolomanov, O. V.; Bourhis, L. J.; Gildea, R. J.; Howard, J. A. K.; Puschmann, H. J. *Appl. Crystallogr.* **2009**, *42*, 339.

(2) Sheldrick, G. M. *Acta Cryst.* **2008**, *A64*, 112.
